# Supplementary material
Source: PubMed Central journal article supplement (PMC9488988)
Supplement: ERR-0096-2018.tableS1.pdf [file ERR-0096-2018.tableS1.pdf]

Supplemental Table 1. Search Criteria

| Database | Keyword                                                                                                                                                                                                                                                                                                                                                                                                                                                                                                 | No of papers                |                                 |    |        |     |                                                     |    |                 |
|----------|---------------------------------------------------------------------------------------------------------------------------------------------------------------------------------------------------------------------------------------------------------------------------------------------------------------------------------------------------------------------------------------------------------------------------------------------------------------------------------------------------------|-----------------------------|---------------------------------|----|--------|-----|-----------------------------------------------------|----|-----------------|
| Embase   | particulate matter OR air pollutants OR air pollution OR occupational pollution OR environmental pollution OR ambient air OR pollution OR particle size OR air filters OR smoking OR cigarette smoke                                                                                                                                                                                                                                                                                                    | 810040                      |                                 |    |        |     |                                                     |    |                 |
| PubMed   | particulate matter OR air pollutants OR air pollution OR occupational pollution OR environmental pollution OR ambient air OR pollution OR particle size OR air filters OR smoking OR cigarette smoke                                                                                                                                                                                                                                                                                                    | 871575                      |                                 |    |        |     |                                                     |    |                 |
| Embase   | advanced glycation end products receptor OR rage OR ager                                                                                                                                                                                                                                                                                                                                                                                                                                                | 9640                        |                                 |    |        |     |                                                     |    |                 |
| PubMed   | advanced glycation end products receptor OR rage OR ager                                                                                                                                                                                                                                                                                                                                                                                                                                                | 8028                        |                                 |    |        |     |                                                     |    |                 |
| Embase   | lung OR respiratory OR lung diseases OR obstructive lung disease OR obstructive airway disease OR obstructive airways disease OR asthma OR chronic bronchitis OR copd OR chronic obstructive pulmonary disease OR emphysema                                                                                                                                                                                                                                                                             | 2127364                     |                                 |    |        |     |                                                     |    |                 |
| PubMed   | lung OR respiratory OR lung diseases OR obstructive lung disease OR obstructive airway disease OR obstructive airways disease OR asthma OR chronic bronchitis OR copd OR chronic obstructive pulmonary disease OR emphysema                                                                                                                                                                                                                                                                             | 1547934                     |                                 |    |        |     |                                                     |    |                 |
| Embase   | (particulate matter OR air pollutants OR air pollution OR occupational pollution OR environmental pollution OR ambient air OR pollution OR particle size OR air filters OR smoking OR cigarette smoke) AND (advanced glycation end products receptor OR rage OR ager) AND (lung OR respiratory OR lung diseases OR obstructive lung disease OR obstructive airway disease OR obstructive airways disease OR asthma OR chronic bronchitis OR copd OR chronic obstructive pulmonary disease OR emphysema) | 130                         | filtered for english and humans | 83 | Merged | 137 | Duplicates and non-original research papers removed | 66 |                 |
| PubMed   | (particulate matter OR air pollutants OR air pollution OR occupational pollution OR environmental pollution OR ambient air OR pollution OR particle size OR air filters OR smoking OR cigarette smoke) AND (advanced glycation end products receptor OR rage OR ager) AND (lung OR respiratory OR lung diseases OR obstructive lung disease OR obstructive airway disease OR obstructive airways disease OR asthma OR chronic bronchitis OR copd OR chronic obstructive pulmonary disease OR emphysema) | 83                          | filtered for english and humans | 54 |        |     |                                                     |    |                 |
|          |                                                                                                                                                                                                                                                                                                                                                                                                                                                                                                         |                             |                                 |    |        |     |                                                     |    | Duplicates = 24 |
|          |                                                                                                                                                                                                                                                                                                                                                                                                                                                                                                         | Total= 213                  |                                 |    |        |     |                                                     |    |                 |
|          |                                                                                                                                                                                                                                                                                                                                                                                                                                                                                                         | Duplicates = 29             |                                 |    |        |     |                                                     |    |                 |
| 1/5/2018 |                                                                                                                                                                                                                                                                                                                                                                                                                                                                                                         | english & human filter = 76 |                                 |    |        |     |                                                     |    |                 |
|          |                                                                                                                                                                                                                                                                                                                                                                                                                                                                                                         | Non original = 47           |                                 |    |        |     |                                                     |    |                 |
|          |                                                                                                                                                                                                                                                                                                                                                                                                                                                                                                         | remaining = 61              |                                 |    |        |     |                                                     |    |                 |
|          |                                                                                                                                                                                                                                                                                                                                                                                                                                                                                                         |                             | excluded in screening           |    |        |     |                                                     |    |                 |
|          |                                                                                                                                                                                                                                                                                                                                                                                                                                                                                                         |                             | in clean (66)                   |    |        |     |                                                     |    |                 |
