# Supplementary material
Source: PubMed Central journal article supplement (PMC9488988)
Supplement: ERR-0096-2018.tableS2.pdf [file ERR-0096-2018.tableS2.pdf]

| Supplemental Table 2. Embase Filtered (n=83)                                                                                                                                   |                                                  |                                                                                                                                                                           |                                                                                                                                                               |                                                   |        |                     |
|--------------------------------------------------------------------------------------------------------------------------------------------------------------------------------|--------------------------------------------------|---------------------------------------------------------------------------------------------------------------------------------------------------------------------------|---------------------------------------------------------------------------------------------------------------------------------------------------------------|---------------------------------------------------|--------|---------------------|
| Cigarettes smoke extract induces inflammatory gene expression in human bronchial epithelial cells.                                                                             | <a href="#">Click here for full text options</a> | Alshehri M.<br>Brand O.<br>Alqarni A.<br>Pasini A.<br>Pang L.                                                                                                             | Thorax. Conference: British Thoracic Society Winter Meeting, BTS 2017. United Kingdom. 72 (Supplement 3) (pp A146), 2017. Date of Publication: December 2017. | BMJ Publishing Group                              | Embase | Conference Abstract |
| Receptor for advanced glycation endproducts and World Trade Center particulate induced lung function loss: A case-cohort study and murine model of acute particulate exposure. | <a href="#">Click here for full text options</a> | Caraher E.J.<br>Kwon S.<br>Haider S.H.<br>Crowley G.<br>Lee A.<br>Ebrahim M.<br>Zhang L.<br>Chen L.-C.<br>Gordon T.<br>Liu M.<br>Prezant D.J.<br>Schmidt A.M.<br>Nolan A. | PLoS ONE. 12 (9) (no pagination), 2017. Article Number: e0184331. Date of Publication: September 2017.                                                        | Public Library of Science (E-mail: plos@plos.org) | Embase | Article             |
| Srage as biomarker for COPD, introducing novel LC-MS-based methods for the quantification of serum srage levels.                                                               | <a href="#">Click here for full text options</a> | Pouwels S.D.<br>Klont F.<br>Van De Merbel N.<br>Horvatovich P.<br>Ten Hacken N.H.T.<br>Bischoff R.                                                                        | American Journal of Respiratory and Critical Care Medicine. Conference: American Thoracic Society International Conference,                                   | American Thoracic Society                         | Embase | Conference Abstract |

|                                                                                                                     |                                                  |                                                                                                 |                                                                                                                                                                                                            |                                                             |        |                     |
|---------------------------------------------------------------------------------------------------------------------|--------------------------------------------------|-------------------------------------------------------------------------------------------------|------------------------------------------------------------------------------------------------------------------------------------------------------------------------------------------------------------|-------------------------------------------------------------|--------|---------------------|
|                                                                                                                     |                                                  |                                                                                                 | ATS 2017. United States. 195 (no pagination), 2017. Date of Publication: 2017.                                                                                                                             |                                                             |        |                     |
| SNP-based risk score out performs a clinical model for dying of lung cancer in the NLST-ACRIN sub-study (n=10,054). | <a href="#">Click here for full text options</a> | Young R.P.<br>Duan F.<br>Greco E.<br>Hopkins R.J.<br>Chiles C.<br>Gamble G.D.<br>Aberle D.      | American Journal of Respiratory and Critical Care Medicine. Conference: American Thoracic Society International Conference, ATS 2017. United States. 195 (no pagination), 2017. Date of Publication: 2017. | American Thoracic Society                                   | Embase | Conference Abstract |
| Cigarette smoking is associated with biological heterogeneity amongst blunt trauma patients with ARDS.              | <a href="#">Click here for full text options</a> | Moazed F.<br>Hendrickson C.<br>Nelson M.<br>Conroy A.<br>Arambulo M.<br>Cohen M.<br>Calfee C.S. | American Journal of Respiratory and Critical Care Medicine. Conference: American Thoracic Society International Conference, ATS 2017. United States. 195 (no pagination), 2017. Date of Publication: 2017. | American Thoracic Society                                   | Embase | Conference Abstract |
| A pilot study linking endothelial injury in lungs and kidneys in chronic obstructive                                | <a href="#">Click here for full text options</a> | Polverino F.<br>Lauchó-Contreras M.E.<br>Petersen H.<br>Bijol V.                                | American Journal of Respiratory and Critical Care Medicine. 195 (11) (pp 1464-1476),                                                                                                                       | American Thoracic Society (E-mail: malexander@thoracic.org) | Embase | Article             |

|                                                                                                                                 |                                                  |                                                                                                                                                                                            |                                                                                                                                                      |                                                   |        |                     |
|---------------------------------------------------------------------------------------------------------------------------------|--------------------------------------------------|--------------------------------------------------------------------------------------------------------------------------------------------------------------------------------------------|------------------------------------------------------------------------------------------------------------------------------------------------------|---------------------------------------------------|--------|---------------------|
| pulmonary disease.                                                                                                              |                                                  | Sholl L.M.<br>Choi M.E.<br>Divo M.<br>Pinto-Plata V.<br>Chetta A.<br>Tesdaigzi Y.<br>Celli B.R.<br>Owen C.A.                                                                               | 2017. Date of Publication:<br>01 Jun 2017.                                                                                                           |                                                   |        |                     |
| Involvement of RAGE signaling and inflammatory cytokine elaboration following in vitro exposure to electronic cigarette liquid. | <a href="#">Click here for full text options</a> | Hirschi K.M.<br>Lewis J.B.<br>Ostergar A.S.<br>Hall P.D.<br>Broberg D.S.<br>Arroyo J.A.<br>Reynolds P.R.                                                                                   | FASEB Journal. Conference: Experimental Biology 2017, EB. United States. 31 (1 Supplement 1) (no pagination), 2017. Date of Publication: April 2017. | FASEB                                             | Embase | Conference Abstract |
| The Ser82 RAGE variant affects lung function and serum RAGE in smokers and sRAGE production in vitro.                           | <a href="#">Click here for full text options</a> | Miller S.<br>Henry A.P.<br>Hodge E.<br>Kheirallah A.K.<br>Billington C.K.<br>Rimington T.L.<br>Bhaker S.K.<br>Obeidat M.<br>Melen E.<br>Merid S.K.<br>Swan C.<br>Gowland C.<br>Nelson C.P. | PLoS ONE. 11 (10) (no pagination), 2016. Article Number: e0164041. Date of Publication: October 2016.                                                | Public Library of Science (E-mail: plos@plos.org) | Embase | Article             |

|                                                                                                  |                                                         |                                                                                                                                                                                                                                                                                                             |                                                                                                                  |                                                                                                                |               |                |
|--------------------------------------------------------------------------------------------------|---------------------------------------------------------|-------------------------------------------------------------------------------------------------------------------------------------------------------------------------------------------------------------------------------------------------------------------------------------------------------------|------------------------------------------------------------------------------------------------------------------|----------------------------------------------------------------------------------------------------------------|---------------|----------------|
|                                                                                                  |                                                         | <p>Stewart C.E.</p> <p>Bolton C.E.</p> <p>Kilty I.</p> <p>Malarstig A.</p> <p>Parker S.G.</p> <p>Moffatt M.F.</p> <p>Wardlaw A.J.</p> <p>Hall I.P.</p> <p>Sayers I.</p>                                                                                                                                     |                                                                                                                  |                                                                                                                |               |                |
| <p>Advanced glycation endproducts and their receptor in different body compartments in COPD.</p> | <p><a href="#">Click here for full text options</a></p> | <p>Hoonhorst S.J.M.</p> <p>Lo Tam Loi A.T.</p> <p>Pouwels S.D.</p> <p>Faiz A.</p> <p>Telenga E.D.</p> <p>van den Berge M.</p> <p>Koenderman L.</p> <p>Lammers J.-W.J.</p> <p>Boezen H.M.</p> <p>van Oosterhout A.J.M.</p> <p>Lodewijk M.E.</p> <p>Timens W.</p> <p>Postma D.S.</p> <p>ten Hacken N.H.T.</p> | <p>Respiratory Research. 17 (1) (no pagination), 2016. Article Number: 46. Date of Publication: 26 Apr 2016.</p> | <p>BioMed Central Ltd. (E-mail: info@biomedcentral.com)</p>                                                    | <p>Embase</p> | <p>Article</p> |
| <p>Association between HMGB1 and COPD: A systematic review.</p>                                  | <p><a href="#">Click here for full text options</a></p> | <p>Gangemi S.</p> <p>Casciaro M.</p> <p>Trapani G.</p> <p>Quartuccio S.</p>                                                                                                                                                                                                                                 | <p>Mediators of Inflammation. 2015 (no pagination), 2015. Article Number: 164913. Date of</p>                    | <p>Hindawi Publishing Corporation (410 Park Avenue, 15th Floor, 287 pmb, New York NY 10022, United States)</p> | <p>Embase</p> | <p>Review</p>  |

|                                                                                                        |                                                  |                                                                                                                                                                                                                           |                                                                                                              |                                                                         |        |         |
|--------------------------------------------------------------------------------------------------------|--------------------------------------------------|---------------------------------------------------------------------------------------------------------------------------------------------------------------------------------------------------------------------------|--------------------------------------------------------------------------------------------------------------|-------------------------------------------------------------------------|--------|---------|
|                                                                                                        |                                                  | Navarra M.<br>Pioggia G.<br>Imbalzano E.                                                                                                                                                                                  | Publication:<br>2015.                                                                                        |                                                                         |        |         |
| Candidate genes for COPD: Current evidence and research.                                               | <a href="#">Click here for full text options</a> | Kim W.J.<br>Lee S.D.                                                                                                                                                                                                      | International Journal of COPD. 10 (1) (pp 2249-2255), 2015. Article Number: A235. Date of Publication: 2015. | Dove Medical Press Ltd. (PO Box 300-008, Albany, Auckland, New Zealand) | Embase | Review  |
| Relationship between gene expression and lung function in Idiopathic Interstitial Pneumonias.          | <a href="#">Click here for full text options</a> | Steele M.P.<br>Luna L.G.<br>Coldren C.D.<br>Murphy E.<br>Hennessy C.E.<br>Heinz D.<br>Evans C.M.<br>Groshong S.<br>Cool C.<br>Cosgrove G.P.<br>Brown K.K.<br>Fingerlin T.E.<br>Schwarz M.I.<br>Schwartz D.A.<br>Yang I.V. | BMC Genomics. 16 (1) (no pagination), 2015. Article Number: 869. Date of Publication: October 26, 2015.      | BioMed Central Ltd. (E-mail: info@biomedcentral.com)                    | Embase | Article |
| Plausible roles for RAGE in conditions exacerbated by direct and indirect (secondhand) smoke exposure. | <a href="#">Click here for full text options</a> | Lewis J.B.<br>Hirschi K.M.<br>Arroyo J.A.<br>Bikman B.T.<br>Kooyman D.L.                                                                                                                                                  | International Journal of Molecular Sciences. 18 (3) (no pagination), 2017. Article Number: 652. Date of      | MDPI AG (Postfach, Basel CH-4005, Switzerland)                          | Embase | Review  |

|                                                                                                                                                                                          |                                                  |                                                                                                                                                                                                                                                  |                                                                                                                                                                             |                                                      |        |                     |
|------------------------------------------------------------------------------------------------------------------------------------------------------------------------------------------|--------------------------------------------------|--------------------------------------------------------------------------------------------------------------------------------------------------------------------------------------------------------------------------------------------------|-----------------------------------------------------------------------------------------------------------------------------------------------------------------------------|------------------------------------------------------|--------|---------------------|
|                                                                                                                                                                                          |                                                  | Reynolds P.R.                                                                                                                                                                                                                                    | Publication:<br>17 Mar 2017.                                                                                                                                                |                                                      |        |                     |
| Receptor for advanced glycation end products contributes to particulate induced lung function loss and hyperreactivity: Mitigating the effects of a single intense particulate exposure. | <a href="#">Click here for full text options</a> | Kwon S.<br>Caraher E.J.<br>Haider S.H.<br>Crowley G.<br>Lee A.K.<br>Ebrahim M.<br>Zedan M.<br>Prezant D.J.<br>Schmidt A.M.<br>Nolan A.                                                                                                           | European Respiratory Journal.<br>Conference: European Respiratory Society Annual Congress 2016. United Kingdom. 48 (no pagination), 2016. Date of Publication: 01 Sep 2016. | European Respiratory Society                         | Embase | Conference Abstract |
| Advanced glycation endproducts and their receptor in different body compartments in COPD.                                                                                                | <a href="#">Click here for full text options</a> | Hoonhorst S.J.M.<br>Lo Tam Loi A.T.<br>Pouwels S.D.<br>Faiz A.<br>Telenga E.D.<br>van den Berge M.<br>Koenderman L.<br>Lammers J.-W.J.<br>Boezen H.M.<br>van Oosterhout A.J.M.<br>Lodewijk M.E.<br>Timens W.<br>Postma D.S.<br>ten Hacken N.H.T. | Respiratory Research. 17 (1) (no pagination), 2016. Article Number: 46. Date of Publication: 26 Apr 2016.                                                                   | BioMed Central Ltd. (E-mail: info@biomedcentral.com) | Embase | Article             |

|                                                                                                                         |                                                         |                                                                                                                                                                                                                                                                                                                                                            |                                                                                                                          |                                                                                        |               |                |
|-------------------------------------------------------------------------------------------------------------------------|---------------------------------------------------------|------------------------------------------------------------------------------------------------------------------------------------------------------------------------------------------------------------------------------------------------------------------------------------------------------------------------------------------------------------|--------------------------------------------------------------------------------------------------------------------------|----------------------------------------------------------------------------------------|---------------|----------------|
| <p>The Ser82 RAGE variant affects lung function and serum RAGE in smokers and sRAGE production in vitro.</p>            | <p><a href="#">Click here for full text options</a></p> | <p>Miller S.<br/>Henry A.P.<br/>Hodge E.<br/>Kheirallah A.K.<br/>Billington C.K.<br/>Rimington T.L.<br/>Bhaker S.K.<br/>Obeidat M.<br/>Melen E.<br/>Merid S.K.<br/>Swan C.<br/>Gowland C.<br/>Nelson C.P.<br/>Stewart C.E.<br/>Bolton C.E.<br/>Kilty I.<br/>Malarstig A.<br/>Parker S.G.<br/>Moffatt M.F.<br/>Wardlaw A.J.<br/>Hall I.P.<br/>Sayers I.</p> | <p>PLoS ONE. 11 (10) (no pagination), 2016. Article Number: e0164041. Date of Publication: October 2016.</p>             | <p>Public Library of Science (E-mail: plos@plos.org)</p>                               | <p>Embase</p> | <p>Article</p> |
| <p>Sputum-plasma ratio of soluble receptor for advanced glycation end-products in patients with chronic obstructive</p> | <p><a href="#">Click here for full text options</a></p> | <p>Hassanein E.G.<br/>ElGanady A.A.<br/>Baess A.I.<br/>Issa Y.A.<br/>ElAkhtel E.M.</p>                                                                                                                                                                                                                                                                     | <p>Egyptian Journal of Chest Diseases and Tuberculosis. 65 (3) (pp 573-578), 2016. Date of Publication: 01 Jul 2016.</p> | <p>Egyptian Society Of Chest Diseases And Tuberculosis (E-mail: info@egyptsct.org)</p> | <p>Embase</p> | <p>Article</p> |

|                                                                                                                                           |                                                  |                                                                                                                                                  |                                                                                                                                                                                                                                                                                                                              |                                 |        |                     |
|-------------------------------------------------------------------------------------------------------------------------------------------|--------------------------------------------------|--------------------------------------------------------------------------------------------------------------------------------------------------|------------------------------------------------------------------------------------------------------------------------------------------------------------------------------------------------------------------------------------------------------------------------------------------------------------------------------|---------------------------------|--------|---------------------|
| pulmonary disease.                                                                                                                        |                                                  |                                                                                                                                                  |                                                                                                                                                                                                                                                                                                                              |                                 |        |                     |
| Ex vivo elastase treatment disrupts parenchymal structure and enhances airway narrowing in precision cut lung slices.                     | <a href="#">Click here for full text options</a> | Van Dijk E.M.<br>Culha S.<br>Bidan C.<br>Menzen M.<br>Gosens R.                                                                                  | FASEB Journal.<br>Conference: Experimental Biology 2016, EB. San Diego, CA United States.<br>Conference Publication: (var.pagings). 30 (no pagination), 2016. Date of Publication: April 2016.                                                                                                                               | FASEB                           | Embase | Conference Abstract |
| Elevated plasma PAI-1 levels in the donor are associated with the development of primary graft dysfunction in lung transplant recipients. | <a href="#">Click here for full text options</a> | Hamilton B.C.<br>Dincheva G.R.<br>Abbott J.<br>Zhuo H.<br>Golden J.A.<br>Hays S.R.<br>Brzezinski M.<br>Singer J.P.<br>Matthay M.A.<br>Kukreja J. | Journal of Heart and Lung Transplantation.<br>Conference: 36th Annual Meeting and Scientific Sessions of the International Society for Heart and Lung Transplantation, ISHLT 2016. Washington, DC United States.<br>Conference Publication: (var.pagings). 35 (4 SUPPL. 1) (pp S316), 2016. Date of Publication: April 2016. | Elsevier USA                    | Embase | Conference Abstract |
| Expression and DNA methylation status of the                                                                                              | <a href="#">Click here for</a>                   | Zhang S.<br>Zhou M.                                                                                                                              | Inhalation Toxicology. 27 (10) (pp                                                                                                                                                                                                                                                                                           | Taylor and Francis Ltd (E-mail: | Embase | Article             |



|                                                                                          |                                                  |                                                                                                                                                                                                                                                                 |                                                                                                                                 |                                                                 |        |         |
|------------------------------------------------------------------------------------------|--------------------------------------------------|-----------------------------------------------------------------------------------------------------------------------------------------------------------------------------------------------------------------------------------------------------------------|---------------------------------------------------------------------------------------------------------------------------------|-----------------------------------------------------------------|--------|---------|
| Rap2B gene in human bronchial epithelial cells treated by cigarette smoke condensate.    | <a href="#">full text options</a>                | Jiang G.<br>Gong C.<br>Cui D.<br>Luo L.<br>Wu D.<br>Huang H.<br>Zhang Q.<br>Yang L.                                                                                                                                                                             | 502-509),<br>2015. Date of Publication:<br>24 Aug 2015.                                                                         | healthcare.enquiries@informa.com)                               |        |         |
| A genome-wide association study of emphysema and airway quantitative imaging phenotypes. | <a href="#">Click here for full text options</a> | Cho M.H.<br>Castaldi P.J.<br>Hersh C.P.<br>Hobbs B.D.<br>Barr R.G.<br>Tal-Singer R.<br>Bakke P.<br>Gulsvik A.<br>San Jose Estepar R.<br>Van Beek E.J.R.<br>Coxson H.O.<br>Lynch D.A.<br>Washko G.R.<br>Laird N.M.<br>Crapo J.D.<br>Beaty T.H.<br>Silverman E.K. | American Journal of Respiratory and Critical Care Medicine. 192 (5) (pp 559-569),<br>2015. Date of Publication:<br>01 Sep 2015. | American Thoracic Society (E-mail: malexander@thoracic.org)     | Embase | Article |
| RAGE-ligands axis: A new 'driving force' for cigarette smoke-                            | <a href="#">Click here for full</a>              | Li M.<br>Guo L.                                                                                                                                                                                                                                                 | Respirology. 20 (6) (pp 998-999),<br>2015. Date of                                                                              | Blackwell Publishing (E-mail: info@asia.blackpublishing.com.au) | Embase | Letter  |

|                                                                                                                                                             |                                                  |                                                                                                                                                                                                                           |                                                                                                                              |                                                             |        |         |
|-------------------------------------------------------------------------------------------------------------------------------------------------------------|--------------------------------------------------|---------------------------------------------------------------------------------------------------------------------------------------------------------------------------------------------------------------------------|------------------------------------------------------------------------------------------------------------------------------|-------------------------------------------------------------|--------|---------|
| induced airway inflammation in COPD?.                                                                                                                       | <a href="#">text options</a>                     | Wang H.<br>Wang T.<br>Shen Y.<br>Liao Z.<br>Wen F.<br>Chen L.                                                                                                                                                             | Publication:<br>01 Aug 2015.                                                                                                 |                                                             |        |         |
| Receptor for advanced glycation end-products regulates lung fluid balance via protein kinase C-gp91<sup>phox</sup> signaling to epithelial sodium channels. | <a href="#">Click here for full text options</a> | Downs C.A.<br>Kreiner L.H.<br>Johnson N.M.<br>Brown L.A.<br>Helms M.N.                                                                                                                                                    | American Journal of Respiratory Cell and Molecular Biology. 52 (1) (pp 75-87), 2015.<br>Date of Publication:<br>01 Jan 2015. | American Thoracic Society (E-mail: malexander@thoracic.org) | Embase | Article |
| Relationship between gene expression and lung function in Idiopathic Interstitial Pneumonias.                                                               | <a href="#">Click here for full text options</a> | Steele M.P.<br>Luna L.G.<br>Coldren C.D.<br>Murphy E.<br>Hennessy C.E.<br>Heinz D.<br>Evans C.M.<br>Groshong S.<br>Cool C.<br>Cosgrove G.P.<br>Brown K.K.<br>Fingerlin T.E.<br>Schwarz M.I.<br>Schwartz D.A.<br>Yang I.V. | BMC Genomics. 16 (1) (no pagination), 2015. Article Number: 869.<br>Date of Publication:<br>October 26, 2015.                | BioMed Central Ltd. (E-mail: info@biomedcentral.com)        | Embase | Article |

|                                                                                                              |                                                  |                                                                                                      |                                                                                                                                                                                              |                                                                                                         |        |                     |
|--------------------------------------------------------------------------------------------------------------|--------------------------------------------------|------------------------------------------------------------------------------------------------------|----------------------------------------------------------------------------------------------------------------------------------------------------------------------------------------------|---------------------------------------------------------------------------------------------------------|--------|---------------------|
| Expression of the receptor for advanced glycation end-products and frequency of polymorphism in lung cancer. | <a href="#">Click here for full text options</a> | Wang H.<br>Li Y.<br>Yu W.<br>Ma L.<br>Ji X.<br>Xiao W.                                               | Oncology Letters. 10 (1) (pp 51-60), 2015. Date of Publication: 01 Jul 2015.                                                                                                                 | Spandidos Publications (10 Vriaxidos Street, Athens 116 10, Greece)                                     | Embase | Article             |
| Candidate genes for COPD: Current evidence and research.                                                     | <a href="#">Click here for full text options</a> | Kim W.J.<br>Lee S.D.                                                                                 | International Journal of COPD. 10 (1) (pp 2249-2255), 2015. Article Number: A235. Date of Publication: 2015.                                                                                 | Dove Medical Press Ltd. (PO Box 300-008, Albany, Auckland, New Zealand)                                 | Embase | Review              |
| Association between HMGB1 and COPD: A systematic review.                                                     | <a href="#">Click here for full text options</a> | Gangemi S.<br>Casciaro M.<br>Trapani G.<br>Quartuccio S.<br>Navarra M.<br>Pioggia G.<br>Imbalzano E. | Mediators of Inflammation. 2015 (no pagination), 2015. Article Number: 164913. Date of Publication: 2015.                                                                                    | Hindawi Publishing Corporation (410 Park Avenue, 15th Floor, 287 pmb, New York NY 10022, United States) | Embase | Review              |
| Increased circulating alveolar epithelial microparticles in COPD patients.                                   | <a href="#">Click here for full text options</a> | Takahashi T.<br>Yamada M.<br>Kobayashi S.<br>Makiguchi T.<br>Ota C.<br>Kubo H.                       | European Respiratory Journal. Conference: European Respiratory Society Annual Congress 2015. Amsterdam Netherlands. Conference Publication: (var.pagings). 46 (no pagination), 2015. Date of | European Respiratory Society                                                                            | Embase | Conference Abstract |

|                                                                                                                        |                                                  |                                                                                                                       |                                                                                                                                                                                                                                                                 |                              |        |                     |
|------------------------------------------------------------------------------------------------------------------------|--------------------------------------------------|-----------------------------------------------------------------------------------------------------------------------|-----------------------------------------------------------------------------------------------------------------------------------------------------------------------------------------------------------------------------------------------------------------|------------------------------|--------|---------------------|
|                                                                                                                        |                                                  |                                                                                                                       | Publication:<br>01 Sep 2015.                                                                                                                                                                                                                                    |                              |        |                     |
| Receptor for advanced glycation end products (RAGE) is involved in cigarette smoke induced inflammation and emphysema. | <a href="#">Click here for full text options</a> | Wolf L.<br>Niederstraser J.<br>Christian H.<br>Robert B.                                                              | European Respiratory Journal.<br>Conference: European Respiratory Society Annual Congress 2015. Amsterdam Netherlands. Conference Publication: (var.pagings). 46 (no pagination), 2015. Date of Publication: 01 Sep 2015.                                       | European Respiratory Society | Embase | Conference Abstract |
| Additive and synergistic effects of LPA in world trade center particulate matter-induced inflammation.                 | <a href="#">Click here for full text options</a> | Caraher E.J.<br>Kwon S.<br>Lee A.K.<br>Chen L.-C.<br>Gordon T.<br>Prezant D.J.<br>Rom W.N.<br>Weiden M.D.<br>Nolan A. | American Journal of Respiratory and Critical Care Medicine.<br>Conference: American Thoracic Society International Conference, ATS 2015. Denver, CO United States. Conference Publication: (var.pagings). 191 (no pagination), 2015. Date of Publication: 2015. | American Thoracic Society    | Embase | Conference Abstract |

|                                                                                                                         |                                                         |                                                                                                                                                                           |                                                                                                                                                                                                                                                                     |                                  |               |                            |
|-------------------------------------------------------------------------------------------------------------------------|---------------------------------------------------------|---------------------------------------------------------------------------------------------------------------------------------------------------------------------------|---------------------------------------------------------------------------------------------------------------------------------------------------------------------------------------------------------------------------------------------------------------------|----------------------------------|---------------|----------------------------|
| <p>Inciting rage: World trade center lung injury and potential therapy with pioglitazone in a murine model.</p>         | <p><a href="#">Click here for full text options</a></p> | <p>Caraher E.J.<br/>Kwon S.<br/>Lee A.K.<br/>Echevarria G.C.<br/>Chen L.-C.<br/>Gordon T.<br/>Prezant D.J.<br/>Rom W.N.<br/>Schmidt A.M.<br/>Weiden M.D.<br/>Nolan A.</p> | <p>American Journal of Respiratory and Critical Care Medicine. Conference: American Thoracic Society International Conference, ATS 2015. Denver, CO United States. Conference Publication: (var.pagings). 191 (no pagination), 2015. Date of Publication: 2015.</p> | <p>American Thoracic Society</p> | <p>Embase</p> | <p>Conference Abstract</p> |
| <p>Soluble receptor for advanced glycation end-products (sRAGE) in smokers, COPD and obstructive sleep apnea (OSA).</p> | <p><a href="#">Click here for full text options</a></p> | <p>Simon A.L.<br/>Andres M.<br/>Cubero P.<br/>Gil V.<br/>Forner M.<br/>Carrizo S.<br/>Marin J.M.</p>                                                                      | <p>American Journal of Respiratory and Critical Care Medicine. Conference: American Thoracic Society International Conference, ATS 2015. Denver, CO United States. Conference Publication: (var.pagings). 191 (no pagination), 2015. Date of Publication: 2015.</p> | <p>American Thoracic Society</p> | <p>Embase</p> | <p>Conference Abstract</p> |

|                                                                                                 |                                                         |                                                                                                                                                                                                                                       |                                                                                                                                                                                                                                                                     |                                         |               |                            |
|-------------------------------------------------------------------------------------------------|---------------------------------------------------------|---------------------------------------------------------------------------------------------------------------------------------------------------------------------------------------------------------------------------------------|---------------------------------------------------------------------------------------------------------------------------------------------------------------------------------------------------------------------------------------------------------------------|-----------------------------------------|---------------|----------------------------|
| <p>A genome-wide association study of emphysema and airway quantitative imaging phenotypes.</p> | <p><a href="#">Click here for full text options</a></p> | <p>Cho M.H.<br/>Castaldi P.<br/>Hersh C.P.<br/>Barr R.G.<br/>Tal-Singer R.<br/>Bakke P.<br/>Gulsvik A.<br/>Van Beek E.J.<br/>Coxson H.O.<br/>Lynch D.A.<br/>Washko G.R.<br/>Laird N.<br/>Crapo J.<br/>Beaty T.<br/>Silverman E.K.</p> | <p>American Journal of Respiratory and Critical Care Medicine. Conference: American Thoracic Society International Conference, ATS 2015. Denver, CO United States. Conference Publication: (var.pagings). 191 (no pagination), 2015. Date of Publication: 2015.</p> | <p>American Thoracic Society</p>        | <p>Embase</p> | <p>Conference Abstract</p> |
| <p>In vivo imaging of RAGE expression in a rabbit model of smoke induced emphysema.</p>         | <p><a href="#">Click here for full text options</a></p> | <p>Goldklang M.<br/>Tekabe Y.<br/>Zelonina T.<br/>Trischler J.<br/>Xiao R.<br/>Anthony T.<br/>Shiomi T.<br/>D'Armiento J.<br/>Johnson L.</p>                                                                                          | <p>Journal of Nuclear Medicine. Conference: Society of Nuclear Medicine and Molecular Imaging Annual Meeting, SNMMI 2015. Baltimore, MD United States. Conference Publication: (var.pagings). 56 (no pagination), 2015. Date of Publication: 01 May 2015.</p>       | <p>Society of Nuclear Medicine Inc.</p> | <p>Embase</p> | <p>Conference Abstract</p> |

|                                                                                                                                  |                                                  |                                                                                                                           |                                                                                                                                                                                                                                                                                        |                                                           |        |                      |
|----------------------------------------------------------------------------------------------------------------------------------|--------------------------------------------------|---------------------------------------------------------------------------------------------------------------------------|----------------------------------------------------------------------------------------------------------------------------------------------------------------------------------------------------------------------------------------------------------------------------------------|-----------------------------------------------------------|--------|----------------------|
| Epithelial biomarker rage in donor lung grafts is associated with quality and function of lung grafts at the time of assessment. | <a href="#">Click here for full text options</a> | Singh G.<br>Costa J.<br>Hwang L.<br>Van Hassel J.<br>Biscotti M.<br>Arcasoy S.<br>Sonett J.<br>Lederer D.<br>Bacchetta M. | American Journal of Transplantati on.<br>Conference: 15th Annual State of the Art Winter Symposium of the American Society of Transplant Surgeons, ASTS 2015. Miami, FL United States.<br>Conference Publication: (var.pagings). 15 (pp 106), 2015. Date of Publication: January 2015. | Blackwell Publishing Ltd                                  | Embase | Confere nce Abstract |
| Association of polymorphisms of the receptor for advanced glycation end products gene with COPD in the chinese population.       | <a href="#">Click here for full text options</a> | Li Y.<br>Yang C.<br>Ma G.<br>Gu X.<br>Chen M.<br>Chen Y.<br>Zhao B.<br>Cui L.<br>Li K.                                    | DNA and Cell Biology. 33 (4) (pp 251-258), 2014. Date of Publication: 01 Apr 2014.                                                                                                                                                                                                     | Mary Ann Liebert Inc. (E-mail: info@liebertpub.com)       | Embase | Article              |
| Overexpression of RAGE contributes to cigarette smoke-induced nitric oxide generation in COPD.                                   | <a href="#">Click here for full text options</a> | Chen L.<br>Wang T.<br>Guo L.<br>Shen Y.<br>Yang T.<br>Wan C.                                                              | Lung. 192 (2) (pp 267-275), 2014. Date of Publication: April 2014.                                                                                                                                                                                                                     | Springer New York LLC (E-mail: journals@springer-sbm.com) | Embase | Article              |

|                                                                                                                                                           |                                                  |                                                                                                                                                                                                 |                                                                                                             |                                                                                 |        |         |
|-----------------------------------------------------------------------------------------------------------------------------------------------------------|--------------------------------------------------|-------------------------------------------------------------------------------------------------------------------------------------------------------------------------------------------------|-------------------------------------------------------------------------------------------------------------|---------------------------------------------------------------------------------|--------|---------|
|                                                                                                                                                           |                                                  | Liao Z.<br>Xu D.<br>Wen F.                                                                                                                                                                      |                                                                                                             |                                                                                 |        |         |
| Circulating soluble advanced glycation end product is inversely associated with the significant risk of developing cancer: evidence from a meta-analysis. | <a href="#">Click here for full text options</a> | He L.<br>Bao H.<br>Xue J.<br>Zheng L.<br>Zhang Q.<br>Sun L.<br>Pan H.                                                                                                                           | Tumor Biology. 35 (9) (pp 8749-8755), 2014. Date of Publication: 09 Oct 2014.                               | Kluwer Academic Publishers                                                      | Embase | Article |
| Transient early wheeze and lung function in early childhood associated with chronic obstructive pulmonary disease genes.                                  | <a href="#">Click here for full text options</a> | Kerkhof M.<br>Boezen H.M.<br>Granell R.<br>Wijga A.H.<br>Brunekreef B.<br>Smit H.A.<br>De Jongste J.C.<br>Thijs C.<br>Mommers M.<br>Penders J.<br>Henderson J.<br>Koppelman G.H.<br>Postma D.S. | Journal of Allergy and Clinical Immunology. 133 (1) (pp 68-76.e4), 2014. Date of Publication: January 2014. | Mosby Inc. (11830 Westline Industrial Drive, St. Louis MO 63146, United States) | Embase | Article |
| Soluble receptor for advanced glycation end-products and progression of airway disease.                                                                   | <a href="#">Click here for full text options</a> | Iwamoto H.<br>Gao J.<br>Pulkkinen V.<br>Toljamo T.<br>Nieminen P.                                                                                                                               | BMC Pulmonary Medicine. 14 (1) (no pagination), 2014. Article Number: 68. Date of Publication: 24 Apr 2014. | BioMed Central Ltd. (34 - 42 Cleveland Street, London W1T 4LB, United Kingdom)  | Embase | Article |



|                                                                                              |                                                  |                                                                                                                                                                                                        |                                                                                                            |                                                                               |        |         |
|----------------------------------------------------------------------------------------------|--------------------------------------------------|--------------------------------------------------------------------------------------------------------------------------------------------------------------------------------------------------------|------------------------------------------------------------------------------------------------------------|-------------------------------------------------------------------------------|--------|---------|
|                                                                                              |                                                  | Mazur W.                                                                                                                                                                                               |                                                                                                            |                                                                               |        |         |
| Changes of HMGB1 and sRAGE during the recovery of COPD exacerbation.                         | <a href="#">Click here for full text options</a> | Zhang Y.<br>Li S.<br>Wang G.<br>Han D.<br>Xie X.<br>Wu Y.<br>Xu J.<br>Lu J.<br>Li F.<br>Li M.                                                                                                          | Journal of Thoracic Disease. 6 (6) (pp 734-741), 2014. Date of Publication: 2014.                          | Pioneer Bioscience Publishing (E-mail: jtd@thebpc.org)                        | Embase | Article |
| The association of plasma biomarkers with computed tomography-assessed emphysema phenotypes. | <a href="#">Click here for full text options</a> | Carolan B.J.<br>Hughes G.<br>Morrow J.<br>Hersh C.P.<br>O'Neal W.K.<br>Rennard S.<br>Pillai S.G.<br>Belloni P.<br>Cockayne D.A.<br>Comellas A.P.<br>Han M.<br>Zemans R.L.<br>Kechris K.<br>Bowler R.P. | Respiratory Research. 15 (1) (no pagination), 2014. Article Number: 127. Date of Publication: 12 Oct 2014. | BioMed Central Ltd. (E-mail: info@biomedcentral.com)                          | Embase | Article |
| Association of five genetic variants with chronic                                            | <a href="#">Click here for full</a>              | Yang J.<br>Zhou H.                                                                                                                                                                                     | Respirology. 19 (2) (pp 262-268), 2014. Date of                                                            | Blackwell Publishing (550 Swanston Street, Carlton South VIC 3053, Australia) | Embase | Article |

|                                                                                                                                                            |                                                         |                                                                                             |                                                                                                                                                                                                                                                                        |                                  |               |                            |
|------------------------------------------------------------------------------------------------------------------------------------------------------------|---------------------------------------------------------|---------------------------------------------------------------------------------------------|------------------------------------------------------------------------------------------------------------------------------------------------------------------------------------------------------------------------------------------------------------------------|----------------------------------|---------------|----------------------------|
| <p>obstructive pulmonary disease susceptibility and spirometric phenotypes in a Chinese Han population.</p>                                                | <p><a href="#">text options</a></p>                     | <p>Liang B.<br/>Xiao J.<br/>Su Z.<br/>Chen H.<br/>Ma C.<br/>Li D.<br/>Feng Y.<br/>Ou X.</p> | <p>Publication: February 2014.</p>                                                                                                                                                                                                                                     |                                  |               |                            |
| <p>Soluble receptor for advanced glycation end-products and progression of airway disease.</p>                                                             | <p><a href="#">Click here for full text options</a></p> | <p>Iwamoto H.<br/>Gao J.<br/>Pulkkinen V.<br/>Toljamo T.<br/>Nieminen P.<br/>Mazur W.</p>   | <p>American Journal of Respiratory and Critical Care Medicine. Conference: American Thoracic Society International Conference, ATS 2014. San Diego, CA United States. Conference Publication: (var.pagings). 189 (no pagination), 2014. Date of Publication: 2014.</p> | <p>American Thoracic Society</p> | <p>Embase</p> | <p>Conference Abstract</p> |
| <p>Receptor for advanced glycation end-products regulates lung fluid balance via PKC-NADPH oxidase 2 signaling to alveolar epithelial sodium channels.</p> | <p><a href="#">Click here for full text options</a></p> | <p>Downs C.A.<br/>Johnson N.<br/>Brown L.<br/>Helms M.</p>                                  | <p>American Journal of Respiratory and Critical Care Medicine. Conference: American Thoracic Society International Conference, ATS 2014. San Diego, CA United States.</p>                                                                                              | <p>American Thoracic Society</p> | <p>Embase</p> | <p>Conference Abstract</p> |

|                                                                                                                                                                           |                                                  |                                                                                                                         |                                                                                                                                                                                                                                                                 |                           |        |                     |
|---------------------------------------------------------------------------------------------------------------------------------------------------------------------------|--------------------------------------------------|-------------------------------------------------------------------------------------------------------------------------|-----------------------------------------------------------------------------------------------------------------------------------------------------------------------------------------------------------------------------------------------------------------|---------------------------|--------|---------------------|
|                                                                                                                                                                           |                                                  |                                                                                                                         | Conference Publication: (var.pagings). 189 (no pagination), 2014. Date of Publication: 2014.                                                                                                                                                                    |                           |        |                     |
| Receptor for advanced glycation end products (RAGE) contributes to neutrophil recruitment and alveolar destruction in a mouse model of cigarette smoke induced emphysema. | <a href="#">Click here for full text options</a> | Sambamurthy N.<br>Leme A.S.<br>Oury T.D.<br>Shapiro S.D.                                                                | American Journal of Respiratory and Critical Care Medicine. Conference: American Thoracic Society International Conference, ATS 2014. San Diego, CA United States. Conference Publication: (var.pagings). 189 (no pagination), 2014. Date of Publication: 2014. | American Thoracic Society | Embase | Conference Abstract |
| Soluble rage, MMP-9 and CRP are predictive of particulate matter induced lung disease in WTC exposed firefighters.                                                        | <a href="#">Click here for full text options</a> | Kwon S.<br>Echevarria G.C.<br>Cho S.<br>Tsukiji J.<br>Rom W.N.<br>Prezant D.J.<br>Schmidt A.<br>Weiden M.D.<br>Nolan A. | American Journal of Respiratory and Critical Care Medicine. Conference: American Thoracic Society International Conference, ATS 2014. San Diego, CA United States. Conference Publication: (var.pagings). 189 (no pagination), 2014. Date of                    | American Thoracic Society | Embase | Conference Abstract |

|                                                                                                                                       |                                                  |                                                                                                                  |                                                                                                                                                                                                            |                                                                                 |        |                     |
|---------------------------------------------------------------------------------------------------------------------------------------|--------------------------------------------------|------------------------------------------------------------------------------------------------------------------|------------------------------------------------------------------------------------------------------------------------------------------------------------------------------------------------------------|---------------------------------------------------------------------------------|--------|---------------------|
|                                                                                                                                       |                                                  |                                                                                                                  | Publication:<br>2014.                                                                                                                                                                                      |                                                                                 |        |                     |
| Alterations in gene expression of RAGE and its sheddases in blood of COPD patients do not relate to decreased plasma (e)sRAGE levels. | <a href="#">Click here for full text options</a> | Gopal P.<br>Rutten E.<br>Franssen F.<br>Wouters E.<br>Reynaert N.                                                | European Respiratory Journal.<br>Conference: European Respiratory Society Annual Congress 2014. Munich Germany.<br>Publication: (var.pagings). 44 (no pagination), 2014. Date of Publication: 01 Sep 2014. | European Respiratory Society                                                    | Embase | Conference Abstract |
| Increased expression of receptor for advanced glycation end products in COPD.                                                         | <a href="#">Click here for full text options</a> | Tanaka M.<br>Ueda Y.<br>Shimazaki M.<br>Ueno M.<br>Machida Y.<br>Motono N.<br>Usuda K.<br>Sagawa M.<br>Sakuma T. | European Respiratory Journal.<br>Conference: European Respiratory Society Annual Congress 2014. Munich Germany.<br>Publication: (var.pagings). 44 (no pagination), 2014. Date of Publication: 01 Sep 2014. | European Respiratory Society                                                    | Embase | Conference Abstract |
| Plasma sRAGE and N-(carboxymethyl) lysine in patients with CHF and/or COPD.                                                           | <a href="#">Click here for full text</a>         | Boschetto P.<br>Campo I.<br>Stendardo M.                                                                         | European Journal of Clinical Investigation. 43 (6) (pp 562-569),                                                                                                                                           | Blackwell Publishing Ltd (9600 Garsington Road, Oxford OX4 2XG, United Kingdom) | Embase | Article             |

|                                                                                                                    |                                                  |                                                                                                                                       |                                                                                                                                                                                                                                                                       |                                                                         |        |                     |
|--------------------------------------------------------------------------------------------------------------------|--------------------------------------------------|---------------------------------------------------------------------------------------------------------------------------------------|-----------------------------------------------------------------------------------------------------------------------------------------------------------------------------------------------------------------------------------------------------------------------|-------------------------------------------------------------------------|--------|---------------------|
|                                                                                                                    | <a href="#">options</a>                          | Casimirri E.<br>Tinelli C.<br>Gorrini M.<br>Ceconi C.<br>Fucili A.<br>Potena A.<br>Papi A.<br>Ballerin L.<br>Fabbri L.<br>Luisetti M. | 2013. Date of Publication:<br>June 2013.                                                                                                                                                                                                                              |                                                                         |        |                     |
| Receptor for Advanced Glycation End Products: A New Therapeutic Target for Chronic Obstructive Pulmonary Disease?. | <a href="#">Click here for full text options</a> | Chen L.<br>Liu L.<br>Wang T.<br>Shen Y.-C.<br>Wen F.-Q.                                                                               | Archives of Medical Research. 44 (1) (pp 75-76), 2013.<br>Date of Publication:<br>January 2013.                                                                                                                                                                       | Elsevier Inc. (360 Park Avenue South, New York NY 10010, United States) | Embase | Article             |
| Rage mediates LPA induced pulmonary inflammation.                                                                  | <a href="#">Click here for full text options</a> | Cho S.<br>Kwon S.<br>Naveed B.<br>Schenck E.<br>Tsukiji J.<br>Schmidt A.<br>Prezant D.J.<br>Rom W.N.<br>Weiden M.<br>Nolan A.         | American Journal of Respiratory and Critical Care Medicine. Conference: American Thoracic Society International Conference, ATS 2013. Philadelphia, PA United States. Conference Publication: (var.pagings). 187 (no pagination), 2013. Date of Publication:<br>2013. | American Thoracic Society                                               | Embase | Conference Abstract |

|                                                                                                          |                                                         |                                                                                                                                                                                                                                                                     |                                                                                                                                                                                                                                                                           |                                  |               |                            |
|----------------------------------------------------------------------------------------------------------|---------------------------------------------------------|---------------------------------------------------------------------------------------------------------------------------------------------------------------------------------------------------------------------------------------------------------------------|---------------------------------------------------------------------------------------------------------------------------------------------------------------------------------------------------------------------------------------------------------------------------|----------------------------------|---------------|----------------------------|
| <p>A genome-wide association study of pulmonary function measures in the copdgene study.</p>             | <p><a href="#">Click here for full text options</a></p> | <p>Lutz S.M.<br/> Cho M.H.<br/> McDonald M.-L.<br/> Regan E.A.<br/> Castaldi P.<br/> Hersh C.P.<br/> Mattheisen M.<br/> DeMeo D.<br/> Bowler R.<br/> Parker M.<br/> Foreman M.G.<br/> Beaty T.<br/> Laird N.<br/> Lange C.<br/> Hokanson J.<br/> Silverman E.K.</p> | <p>American Journal of Respiratory and Critical Care Medicine. Conference: American Thoracic Society International Conference, ATS 2013. Philadelphia, PA United States. Conference Publication: (var.pagings). 187 (no pagination), 2013. Date of Publication: 2013.</p> | <p>American Thoracic Society</p> | <p>Embase</p> | <p>Conference Abstract</p> |
| <p>SNP rs2070600 is associated with lung function and the level of serum soluble rage in UK smokers.</p> | <p><a href="#">Click here for full text options</a></p> | <p>Miller S.<br/> Obeidat M.<br/> Portelli M.A.<br/> Gowland C.J.<br/> Henry A.P.<br/> Parker S.G.<br/> Moffatt M.F.<br/> Wardlaw A.J.<br/> Connolly M.J.<br/> Hall I.<br/> Sayers I.</p>                                                                           | <p>American Journal of Respiratory and Critical Care Medicine. Conference: American Thoracic Society International Conference, ATS 2013. Philadelphia, PA United States. Conference Publication: (var.pagings). 187 (no pagination), 2013. Date of</p>                    | <p>American Thoracic Society</p> | <p>Embase</p> | <p>Conference Abstract</p> |

|                                                                                                                                        |                                                  |                                                                                                                                                                                                                      |                                                                                                    |                                                                                                 |        |         |
|----------------------------------------------------------------------------------------------------------------------------------------|--------------------------------------------------|----------------------------------------------------------------------------------------------------------------------------------------------------------------------------------------------------------------------|----------------------------------------------------------------------------------------------------|-------------------------------------------------------------------------------------------------|--------|---------|
|                                                                                                                                        |                                                  |                                                                                                                                                                                                                      | Publication:<br>2013.                                                                              |                                                                                                 |        |         |
| Systemic biomarkers of neutrophilic inflammation, tissue injury and repair in COPD patients with differing levels of disease severity. | <a href="#">Click here for full text options</a> | Cockayne D.A.<br>Cheng D.T.<br>Waschki B.<br>Sridhar S.<br>Ravindran P.<br>Hilton H.<br>Kourteva G.<br>Bitter H.<br>Pillai S.G.<br>Visvanathan S.<br>Muller K.-C.<br>Holz O.<br>Magnussen H.<br>Watz H.<br>Fine J.S. | PLoS ONE. 7 (6) (no pagination), 2012. Article Number: e38629. Date of Publication: 12 Jun 2012.   | Public Library of Science (185 Berry Street, Suite 1300, San Francisco CA 94107, United States) | Embase | Article |
| RAGE: A new frontier in chronic airways disease.                                                                                       | <a href="#">Click here for full text options</a> | Sukkar M.B.<br>Ullah M.A.<br>Gan W.J.<br>Wark P.A.B.<br>Chung K.F.<br>Hughes J.M.<br>Armour C.L.<br>Phipps S.                                                                                                        | British Journal of Pharmacology. 167 (6) (pp 1161-1176), 2012. Date of Publication: November 2012. | John Wiley and Sons Inc. (P.O.Box 18667, Newark NJ 07191-8667, United States)                   | Embase | Review  |

|                                                                                                                                          |                                                  |                                                                                                                                                        |                                                                                                                          |                                                                                            |        |         |
|------------------------------------------------------------------------------------------------------------------------------------------|--------------------------------------------------|--------------------------------------------------------------------------------------------------------------------------------------------------------|--------------------------------------------------------------------------------------------------------------------------|--------------------------------------------------------------------------------------------|--------|---------|
| Manufactured and airborne nanoparticle cardiopulmonary interactions: A review of mechanisms and the possible contribution of mast cells. | <a href="#">Click here for full text options</a> | Shannahan J.H.<br>Kodavanti U.P.<br>Brown J.M.                                                                                                         | Inhalation Toxicology. 24 (5) (pp 320-339), 2012. Date of Publication: April 2012.                                       | Informa Healthcare (69-77 Paul Street, London EC2A 4LQ, United Kingdom)                    | Embase | Review  |
| CHRNA3/5, IREB2, and ADCY2 are associated with severe chronic obstructive pulmonary disease in Poland.                                   | <a href="#">Click here for full text options</a> | Hardin M.<br>Zielinski J.<br>Wan E.S.<br>Hersh C.P.<br>Castaldi P.J.<br>Schwinder E.<br>Hawrylkiewicz I.<br>Sliwinski P.<br>Cho M.H.<br>Silverman E.K. | American Journal of Respiratory Cell and Molecular Biology. 47 (2) (pp 203-208), 2012. Date of Publication: August 2012. | American Thoracic Society (61 Broadway 4th Floor, New York NY 10006 - 2755, United States) | Embase | Article |
| Advanced glycation end products as environmental risk factors for the development of type 1 diabetes.                                    | <a href="#">Click here for full text options</a> | Yap F.Y.T.<br>Kantharidis P.<br>Coughlan M.T.<br>Slattery R.<br>Forbes J.M.                                                                            | Current Drug Targets. 13 (4) (pp 526-540), 2012. Date of Publication: April 2012.                                        | Bentham Science Publishers B.V. (P.O. Box 294, Bussum 1400 AG, Netherlands)                | Embase | Review  |
| Cigarette smoking and inflammation: Cellular and molecular mechanisms.                                                                   | <a href="#">Click here for full text options</a> | Lee J.<br>Taneja V.<br>Vassallo R.                                                                                                                     | Journal of Dental Research. 91 (2) (pp 142-149), 2012. Date of Publication: February 2012.                               | SAGE Publications Inc. (2455 Teller Road, Thousand Oaks CA 91320, United States)           | Embase | Review  |



|                                                                                                                |                                                  |                                                                                                                                                                                                                                                                                                                                  |                                                                                                                                                                                                                                                                            |                           |        |                     |
|----------------------------------------------------------------------------------------------------------------|--------------------------------------------------|----------------------------------------------------------------------------------------------------------------------------------------------------------------------------------------------------------------------------------------------------------------------------------------------------------------------------------|----------------------------------------------------------------------------------------------------------------------------------------------------------------------------------------------------------------------------------------------------------------------------|---------------------------|--------|---------------------|
| Soluble receptor for advanced glycation endproducts (sRAGE) is a biomarker of emphysema in the eclipse cohort. | <a href="#">Click here for full text options</a> | <p>Duvoix A.</p> <p>Miller B.</p> <p>Edwards L.</p> <p>Yates J.</p> <p>Silverman E.K.</p> <p>Celli B.R.</p> <p>Caverley P.</p> <p>Coxson H.O.</p> <p>Crim C.</p> <p>MacNee W.</p> <p>Rennard S.I.</p> <p>Vestbo J.</p> <p>Wouters E.</p> <p>Bakke P.</p> <p>Agusti A.</p> <p>Tal-Singer R.</p> <p>Mayer R.</p> <p>Lomas D.A.</p> | <p>American Journal of Respiratory and Critical Care Medicine. Conference: American Thoracic Society International Conference, ATS 2012. San Francisco, CA United States. Conference Publication: (var.pagings). 185 (no pagination), 2012. Date of Publication: 2012.</p> | American Thoracic Society | Embase | Conference Abstract |
| Combined effects of GWAS SNPs and non-genetic risk factors identify smoker's susceptibility to COPD.           | <a href="#">Click here for full text options</a> | <p>Young R.P.</p> <p>Hopkins R.J.</p> <p>Hay B.A.</p> <p>Gamble G.D.</p>                                                                                                                                                                                                                                                         | <p>American Journal of Respiratory and Critical Care Medicine. Conference: American Thoracic Society International Conference, ATS 2012. San Francisco, CA United States. Conference Publication: (var.pagings).</p>                                                       | American Thoracic Society | Embase | Conference Abstract |

|                                                                                                                                                           |                                                  |                                                                                                                                                                   |                                                                                                                                                                                                                                                                     |                              |        |                     |
|-----------------------------------------------------------------------------------------------------------------------------------------------------------|--------------------------------------------------|-------------------------------------------------------------------------------------------------------------------------------------------------------------------|---------------------------------------------------------------------------------------------------------------------------------------------------------------------------------------------------------------------------------------------------------------------|------------------------------|--------|---------------------|
|                                                                                                                                                           |                                                  |                                                                                                                                                                   | 185 (no pagination), 2012. Date of Publication: 2012.                                                                                                                                                                                                               |                              |        |                     |
| Replicated COPD genes, transient early wheeze and lung function in early childhood.                                                                       | <a href="#">Click here for full text options</a> | Kerkhof M.<br>Boezen H.M.<br>Wijga A.H.<br>Brunekreef B.<br>Smit H.A.<br>De Jongste J.C.<br>Thijs C.<br>Mommers M.<br>Penders J.<br>Koppelman G.H.<br>Postma D.S. | American Journal of Respiratory and Critical Care Medicine. Conference: American Thoracic Society International Conference, ATS 2012. San Francisco, CA United States. Conference Publication: (var.pagings). 185 (no pagination), 2012. Date of Publication: 2012. | American Thoracic Society    | Embase | Conference Abstract |
| Advanced glycation end products and its soluble receptor (sRAGE) are increased in chronic heart failure but not in chronic obstructive pulmonary disease. | <a href="#">Click here for full text options</a> | Boschetto P.<br>Campo I.<br>Stendardo M.<br>Casimirri E.<br>Tinelli C.<br>Ceconi C.<br>Fucili A.<br>Potena A.<br>Ballerin L.<br>Fabbri L.M.<br>Luisetti M.        | European Respiratory Journal. Conference: European Respiratory Society Annual Congress 2012. Vienna Austria. Conference Publication: (var.pagings). 40 (no pagination), 2012. Date of Publication: 01 Sep 2012.                                                     | European Respiratory Society | Embase | Conference Abstract |

|                                                                                                                                                                                                |                                                  |                                                                                                        |                                                                                                                                                                                                       |                                                                                                                               |        |                     |
|------------------------------------------------------------------------------------------------------------------------------------------------------------------------------------------------|--------------------------------------------------|--------------------------------------------------------------------------------------------------------|-------------------------------------------------------------------------------------------------------------------------------------------------------------------------------------------------------|-------------------------------------------------------------------------------------------------------------------------------|--------|---------------------|
| Association of several genes with COPD in a han chinese population.                                                                                                                            | <a href="#">Click here for full text options</a> | Guo Y.<br>Gong Y.<br>Pan C.M.<br>Ren L.<br>Cheng Y.<br>Qian Y.R.<br>Cheng T.<br>Jiang Z.H.<br>Wan H.Y. | Respirology. Conference: 17th Congress of the Asian Pacific Society of Respirology. Hong Kong Hong Kong. Conference Publication: (var.pagings). 17 (pp 37), 2012. Date of Publication: December 2012. | Blackwell Publishing                                                                                                          | Embase | Conference Abstract |
| Soluble receptor for advanced glycation end products in COPD: relationship with emphysema and chronic cor pulmonale: A case-control study.                                                     | <a href="#">Click here for full text options</a> | Miniati M.<br>Monti S.<br>Basta G.<br>Cocci F.<br>Fornai E.<br>Bottai M.                               | Respiratory Research. 12 (no pagination), 2011. Article Number: 37. Date of Publication: 30 Mar 2011.                                                                                                 | BioMed Central Ltd. (Floor 6, 236 Gray's Inn Road, London WC1X 8HB, United Kingdom)                                           | Embase | Article             |
| Road RAGE? The role of diesel particulate matter in lung inflammation.                                                                                                                         | <a href="#">Click here for full text options</a> | Betts K.S.                                                                                             | Environmental health perspectives. 119 (3) (pp a132), 2011. Date of Publication: Mar 2011.                                                                                                            |                                                                                                                               | Embase | Note                |
| Diesel particulate matter induces receptor for advanced glycation end-products (RAGE) expression in pulmonary epithelial cells, and RAGE signaling influences NF-kappaB-mediated inflammation. | <a href="#">Click here for full text options</a> | Reynolds P.R.<br>Wasley K.M.<br>Allison C.H.                                                           | Environmental Health Perspectives. 119 (3) (pp 332-336), 2011. Date of Publication: March 2011.                                                                                                       | Public Health Services, US Dept of Health and Human Services (P.O. Box 12233, Research Triangle Park NC 27709, United States) | Embase | Article             |

|                                                                                                   |                                                  |                                                                |                                                                                                                                                                                                                        |                                                                                 |        |                     |
|---------------------------------------------------------------------------------------------------|--------------------------------------------------|----------------------------------------------------------------|------------------------------------------------------------------------------------------------------------------------------------------------------------------------------------------------------------------------|---------------------------------------------------------------------------------|--------|---------------------|
| Does RAGE protect smokers from COPD?.                                                             | <a href="#">Click here for full text options</a> | Young R.P.<br>Hay B.A.<br>Hopkins R.J.                         | European Respiratory Journal. 38 (3) (pp 743-744), 2011. Date of Publication: September 2011.                                                                                                                          | European Respiratory Society (4 Ave Sainte-Luce, Lausanne CH-1003, Switzerland) | Embase | Letter              |
| Advanced glycation end products and its receptor (RAGE) are increased in patients with COPD.      | <a href="#">Click here for full text options</a> | Wu L.<br>Ma L.<br>Nicholson L.F.B.<br>Black P.N.               | Respiratory Medicine. 105 (3) (pp 329-336), 2011. Date of Publication: March 2011.                                                                                                                                     | W.B. Saunders Ltd (32 Jamestown Road, London NW1 7BY, United Kingdom)           | Embase | Article             |
| Overexpression of RAGE in lungs of patients with COPD: A contributor to oxidative stress in COPD. | <a href="#">Click here for full text options</a> | Chen L.<br>Liu L.<br>Wang T.<br>Wen F.                         | European Respiratory Journal. Conference: European Respiratory Society Annual Congress 2011. Amsterdam Netherlands. Conference Publication: (var.pagings). 38 (no pagination), 2011. Date of Publication: 01 Sep 2011. | European Respiratory Society                                                    | Embase | Conference Abstract |
| Value of the video assisted mediastinoscopy in the thoracic pathology - Our experience.           | <a href="#">Click here for full text options</a> | Savu C.<br>Grigorie V.<br>Petreanu C.<br>Galie N.<br>Tabacu E. | European Respiratory Journal. Conference: European Respiratory Society Annual Congress 2011. Amsterdam Netherlands. Conference Publication: (var.pagings). 38 (no pagination),                                         | European Respiratory Society                                                    | Embase | Conference Abstract |

|                                                                                                                                                                                 |                                                  |                                                                                                                                                     |                                                                                                                                                                                                                                                                                           |                           |        |                     |
|---------------------------------------------------------------------------------------------------------------------------------------------------------------------------------|--------------------------------------------------|-----------------------------------------------------------------------------------------------------------------------------------------------------|-------------------------------------------------------------------------------------------------------------------------------------------------------------------------------------------------------------------------------------------------------------------------------------------|---------------------------|--------|---------------------|
|                                                                                                                                                                                 |                                                  |                                                                                                                                                     | 2011. Date of Publication:<br>01 Sep 2011.                                                                                                                                                                                                                                                |                           |        |                     |
| Lung function and COPD SNP associations implicate bronchial epithelium in pathogenesis of COPD.                                                                                 | <a href="#">Click here for full text options</a> | Young R.P.<br>Hopkins R.J.<br>Hay B.A.<br>Whittington C.F.<br>Gamble G.D.                                                                           | American Journal of Respiratory and Critical Care Medicine. Conference: American Thoracic Society International Conference, ATS 2011. Denver, CO United States. Conference Publication: (var.pagings). 183 (1 Meeting Abstracts) (no pagination), 2011. Date of Publication: 01 May 2011. | American Thoracic Society | Embase | Conference Abstract |
| Whole blood gene expression and serum biomarker profiling in a COPD cohort identifies markers related to neutrophilic inflammation, wound healing and altered B cell signaling. | <a href="#">Click here for full text options</a> | Cockayne D.A.<br>Cheng D.T.<br>Waschki B.<br>Hilton H.<br>Kourteva G.<br>Sridhar S.<br>Ravindran P.<br>Bitter H.<br>Visvanathan S.<br>Mueller K.-C. | American Journal of Respiratory and Critical Care Medicine. Conference: American Thoracic Society International Conference, ATS 2011. Denver, CO United States. Conference Publication: (var.pagings). 183 (1                                                                             | American Thoracic Society | Embase | Conference Abstract |

|                                                                                                                                                                                            |                                                  |                                                                                                                                                                                        |                                                                                                                                                                                                                                                                                          |                           |        |                     |
|--------------------------------------------------------------------------------------------------------------------------------------------------------------------------------------------|--------------------------------------------------|----------------------------------------------------------------------------------------------------------------------------------------------------------------------------------------|------------------------------------------------------------------------------------------------------------------------------------------------------------------------------------------------------------------------------------------------------------------------------------------|---------------------------|--------|---------------------|
|                                                                                                                                                                                            |                                                  | Holz O.<br>Magnussen H.<br>Watz H.<br>Fine J.S.                                                                                                                                        | MeetingAbstracts) (no pagination), 2011. Date of Publication: 01 May 2011.                                                                                                                                                                                                               |                           |        |                     |
| Genes and mirnas associated with severity of lung function impairment in idiopathic interstitial pneumonias (IIPS).                                                                        | <a href="#">Click here for full text options</a> | Yang I.V.<br>Luna L.<br>Coldren C.D.<br>Fingerlin T.<br>Leach S.<br>Murphy E.<br>Lin J.<br>Cosgrove G.P.<br>Lynch D.A.<br>Groshong S.D.<br>Brown K.K.<br>Schwarz M.I.<br>Schwartz D.A. | American Journal of Respiratory and Critical Care Medicine. Conference: American Thoracic Society International Conference, ATS 2011. Denver, CO United States. Conference Publication: (var.pagings). 183 (1 MeetingAbstracts) (no pagination), 2011. Date of Publication: 01 May 2011. | American Thoracic Society | Embase | Conference Abstract |
| Soluble receptor for advanced glycation end products are decreased but not the levels of advanced glycation end product ne-(carboxymethyl)lysine in chronic obstructive pulmonary disease. | <a href="#">Click here for full text options</a> | Gopal P.<br>Rutten E.P.<br>Dentener M.A.<br>Wouters E.F.<br>Reynaert N.L.                                                                                                              | American Journal of Respiratory and Critical Care Medicine. Conference: American Thoracic Society International Conference, ATS 2011. Denver, CO United States. Conference Publication:                                                                                                  | American Thoracic Society | Embase | Conference Abstract |

|                                                                                                                                                       |                                                  |                                                                                                          |                                                                                                                                                                                                                                                                                           |                           |        |                     |
|-------------------------------------------------------------------------------------------------------------------------------------------------------|--------------------------------------------------|----------------------------------------------------------------------------------------------------------|-------------------------------------------------------------------------------------------------------------------------------------------------------------------------------------------------------------------------------------------------------------------------------------------|---------------------------|--------|---------------------|
|                                                                                                                                                       |                                                  |                                                                                                          | (var.pagings).<br>183 (1<br>MeetingAbstr<br>acts) (no<br>pagination),<br>2011. Date of<br>Publication:<br>01 May 2011.                                                                                                                                                                    |                           |        |                     |
| Cigarette smoke extract induces S100a4/rage in human bronchial epithelial cells.                                                                      | <a href="#">Click here for full text options</a> | Monzon M.E.<br>Cancado J.D.<br>Campos M.<br>Mendes E.S.<br>Casalino-Matsuda S.                           | American Journal of Respiratory and Critical Care Medicine. Conference: American Thoracic Society International Conference, ATS 2011. Denver, CO United States. Conference Publication: (var.pagings). 183 (1 MeetingAbstr acts) (no pagination), 2011. Date of Publication: 01 May 2011. | American Thoracic Society | Embase | Conference Abstract |
| A genome-wide association study to assess loci associated with lung function among Hispanic-Americans and Asian-Americans: The mesa lung share study. | <a href="#">Click here for full text options</a> | Powell R.E.<br>Manichaikul A.<br>Burkart K.M.<br>Mychaleckyj J.<br>Raffel L.J.<br>Rich S.S.<br>Barr R.G. | American Journal of Respiratory and Critical Care Medicine. Conference: American Thoracic Society International Conference, ATS 2011. Denver, CO United States. Conference Publication: (var.pagings). 183 (1 MeetingAbstr acts) (no pagination), 2011. Date of Publication: 01 May 2011. | American Thoracic Society | Embase | Conference Abstract |

|                                                                                                                                       |                                                  |                                                                                                                                                                             |                                                                                                                                                                                                       |                                                                                            |        |                     |
|---------------------------------------------------------------------------------------------------------------------------------------|--------------------------------------------------|-----------------------------------------------------------------------------------------------------------------------------------------------------------------------------|-------------------------------------------------------------------------------------------------------------------------------------------------------------------------------------------------------|--------------------------------------------------------------------------------------------|--------|---------------------|
|                                                                                                                                       |                                                  |                                                                                                                                                                             | (var.pagings).<br>183 (1<br>MeetingAbstracts) (no<br>pagination),<br>2011. Date of<br>Publication:<br>01 May 2011.                                                                                    |                                                                                            |        |                     |
| Increased advanced glycation end products in patients with chronic obstructive pulmonary disease (COPD).                              | <a href="#">Click here for full text options</a> | John M.<br>Hussain S.<br>Selvarajah S.<br>Sayers I.<br>Hall I.P.<br>Fairclough L.<br>Bolton C.E.                                                                            | Thorax.<br>Conference:<br>British Thoracic Society Winter Meeting 2011. London United Kingdom.<br>Conference Publication:<br>(var.pagings). 66 (pp A84), 2011. Date of Publication:<br>December 2011. | BMJ Publishing Group                                                                       | Embase | Conference Abstract |
| Expression of high-mobility group box 1 and of receptor for advanced glycation end products in chronic obstructive pulmonary disease. | <a href="#">Click here for full text options</a> | Ferhani N.<br>Letuve S.<br>Kozhich A.<br>Thibaudeau O.<br>Grandsaigne M.<br>Maret M.<br>Dombret M.-C.<br>Sims G.P.<br>Kolbeck R.<br>Coyle A.J.<br>Aubier M.<br>Pretolani M. | American Journal of Respiratory and Critical Care Medicine. 181 (9) (pp 917-927), 2010. Date of Publication:<br>01 May 2010.                                                                          | American Thoracic Society (61 Broadway 4th Floor, New York NY 10006 - 2755, United States) | Embase | Article             |



|                                                                                                                                                              |                                                         |                                                                                                                                               |                                                                                                                                 |                                                                                                   |               |                |
|--------------------------------------------------------------------------------------------------------------------------------------------------------------|---------------------------------------------------------|-----------------------------------------------------------------------------------------------------------------------------------------------|---------------------------------------------------------------------------------------------------------------------------------|---------------------------------------------------------------------------------------------------|---------------|----------------|
| <p>Proteomic studies on receptor for advanced glycation end product variants in idiopathic pulmonary fibrosis and chronic obstructive pulmonary disease.</p> | <p><a href="#">Click here for full text options</a></p> | <p>Ohlmeier S.<br/>Mazur W.<br/>Salmenkivi K.<br/>Myllarniemi M.<br/>Bergmann U.<br/>Kinnula V.L.</p>                                         | <p>Proteomics - Clinical Applications. 4 (1) (pp 97-105), 2010. Date of Publication: January 2010.</p>                          | <p>Wiley-VCH Verlag (P.O. Box 101161, Weinheim D-69451, Germany)</p>                              | <p>Embase</p> | <p>Article</p> |
| <p>Immortalization of human alveolar epithelial cells to investigate nanoparticle uptake.</p>                                                                | <p><a href="#">Click here for full text options</a></p> | <p>Kemp S.J.<br/>Thorley A.J.<br/>Gorelik J.<br/>Seckl M.J.<br/>O'Hare M.J.<br/>Arcaro A.<br/>Korchev Y.<br/>Goldstraw P.<br/>Tetley T.D.</p> | <p>American Journal of Respiratory Cell and Molecular Biology. 39 (5) (pp 591-597), 2008. Date of Publication: 01 Nov 2008.</p> | <p>American Thoracic Society (61 Broadway 4th Floor, New York NY 10006 - 2755, United States)</p> | <p>Embase</p> | <p>Article</p> |
| <p>Amplifiers of systemic inflammation - The role advanced glycation and lipoxidation end products in foods.</p>                                             | <p><a href="#">Click here for full text options</a></p> | <p>Bengmark S.</p>                                                                                                                            | <p>Kuwait Medical Journal. 40 (1) (pp 3-17), 2008. Date of Publication: March 2008.</p>                                         | <p>Kuwait Medical Association (P.O. Box 1202, Safat 13013, Kuwait)</p>                            | <p>Embase</p> | <p>Review</p>  |
