# Supplementary material
Source: PubMed Central journal article supplement (PMC9488988)
Supplement: ERR-0096-2018.tableS3.pdf [file ERR-0096-2018.tableS3.pdf]

| Supplemental Table 3. PubMed Filtered (n=54)                                                                                                                                                   |                  |                                                                                                                                            |                                                                                                    |                                 |          |          |                                  |        |           |                                                         |
|------------------------------------------------------------------------------------------------------------------------------------------------------------------------------------------------|------------------|--------------------------------------------------------------------------------------------------------------------------------------------|----------------------------------------------------------------------------------------------------|---------------------------------|----------|----------|----------------------------------|--------|-----------|---------------------------------------------------------|
| Title                                                                                                                                                                                          | URL              | Description                                                                                                                                | Details                                                                                            | ShortDetails                    | Resource | Type     | Identifiers                      | Db     | EntrezUID | Properties                                              |
| Receptor for advanced glycation end-products and World Trade Center particulate induced lung function loss: A case-cohort study and murine model of acute particulate exposure.                | /pubmed/28926576 | Caraher EJ, Kwon S, Haider SH, Crowley G, Lee A, Ebrahim M, Zhang L, Chen LC, Gordon T, Liu M, Prezant DJ, Schmidt AM, Nolan A.            | PLoS One. 2017 Sep 19;12(9):e0184331. doi: 10.1371/journal.pone.0184331. eCollection 2017.         | PLoS One. 2017                  | PubMed   | citation | PMID:28926576   PMCID:PMC5604982 | pubmed | 28926576  | create date:2017/09/20   first author:Caraher EJ        |
| DNA methylation of extracellular matrix remodeling genes in children exposed to arsenic.                                                                                                       | /pubmed/28579250 | Gonzalez-Cortes T, Recio-Vega R, Lantz RC, Chau BT.                                                                                        | Toxicol Appl Pharmacol. 2017 Aug 15;329:140-147. doi: 10.1016/j.taap.2017.06.001. Epub 2017 Jun 1. | Toxicol Appl Pharmacol. 2017    | PubMed   | citation | PMID:28579250                    | pubmed | 28579250  | create date:2017/06/06   first author:Gonzalez-Cortes T |
| Plausible Roles for RAGE in Conditions Exacerbated by Direct and Indirect (Secondhand) Smoke Exposure.                                                                                         | /pubmed/28304347 | Lewis JB, Hirschi KM, Arroyo JA, Bikman BT, Kooyman DL, Reynolds PR.                                                                       | Int J Mol Sci. 2017 Mar 17;18(3). pii: E652. doi: 10.3390/ijms18030652. Review.                    | Int J Mol Sci. 2017             | PubMed   | citation | PMID:28304347   PMCID:PMC5372664 | pubmed | 28304347  | create date:2017/03/18   first author:Lewis JB          |
| Accounting for Berkson and Classical Measurement Error in Radon Exposure Using a Bayesian Structural Approach in the Analysis of Lung Cancer Mortality in the French Cohort of Uranium Miners. | /pubmed/28118116 | Hoffmann S, Rage E, Laurier D, Laroche P, Guihenneuc C, Ancelet S.                                                                         | Radiat Res. 2017 Feb;187(2):196-209. doi: 10.1667/RR14467.1. Epub 2017 Jan 24.                     | Radiat Res. 2017                | PubMed   | citation | PMID:28118116                    | pubmed | 28118116  | create date:2017/01/25   first author:Hoffmann S        |
| A Pilot Study Linking Endothelial Injury in Lungs and Kidneys in Chronic Obstructive Pulmonary Disease.                                                                                        | /pubmed/28085500 | Polverino F, Laucho-Contreras ME, Petersen H, Bijol V, Sholl LM, Choi ME, Divo M, Pinto-Plata V, Chetta A, Tesfaigzi Y, Celli BR, Owen CA. | Am J Respir Crit Care Med. 2017 Jun 1;195(11):1464-1476. doi: 10.1164/rccm.201609-1765OC.          | Am J Respir Crit Care Med. 2017 | PubMed   | citation | PMID:28085500   PMCID:PMC5470750 | pubmed | 28085500  | create date:2017/01/14   first author:Polverino F       |
| The Ser82 RAGE Variant Affects Lung Function and Serum RAGE in                                                                                                                                 | /pubmed/2775550  | Miller S, Henry AP, Hodge E, Kheirallah AK, Billington CK, Rimington TL, Bhaker SK, Obeidat M,                                             | PLoS One. 2016 Oct 18;11(10):e0164041. doi:                                                        | PLoS One. 2016                  | PubMed   | citation | PMID:27755500                    | pubmed | 27755500  | create date:2016/10/                                    |

|                                                                                                                                                          |                  |                                                                                                                                                                                        |                                                                                                       |                                       |        |           |                                  |        |          |                                                    |
|----------------------------------------------------------------------------------------------------------------------------------------------------------|------------------|----------------------------------------------------------------------------------------------------------------------------------------------------------------------------------------|-------------------------------------------------------------------------------------------------------|---------------------------------------|--------|-----------|----------------------------------|--------|----------|----------------------------------------------------|
| Smokers and sRAGE Production In Vitro.                                                                                                                   |                  | MelÃ©n E, Merid SK, Swan C, Gowland C, Nelson CP, Stewart CE, Bolton CE, Kilty I, Malarstig A, Parker SG, Moffatt MF, Wardlaw AJ, Hall IP, Sayers I.                                   | 10.1371/journal.pone.0164041. eCollection 2016.                                                       |                                       |        |           | PMCID:PMC5068780                 |        |          | 19   first author:Miller S                         |
| Associations of autophagy with lung diffusion capacity and oxygen saturation in severe COPD: effects of particulate air pollution.                       | /pubmed/27468231 | Lee KY, Chiang LL, Ho SC, Liu WT, Chen TT, Feng PH, Su CL, Chuang KJ, Chang CC, Chuang HC.                                                                                             | Int J Chron Obstruct Pulmon Dis. 2016 Jul 11;11:1569-78. doi: 10.2147/COPD.S108993. eCollection 2016. | Int J Chron Obstruct Pulmon Dis. 2016 | PubMed | citatio n | PMID:27468231   PMCID:PMC4946865 | pubmed | 27468231 | create date:2016/07/29   first author:Lee KY       |
| Advanced glycation endproducts and their receptor in different body compartments in COPD.                                                                | /pubmed/27117828 | Hoonhorst SJ, Lo Tam Loi AT, Pouwels SD, Faiz A, Telenga ED, van den Berge M, Koenderman L, Lammers JW, Boezen HM, van Oosterhout AJ, Lodewijk ME, Timens W, Postma DS, Ten Hacken NH. | Respir Res. 2016 Apr 26;17:46. doi: 10.1186/s12931-016-0363-2.                                        | Respir Res. 2016                      | PubMed | citatio n | PMID:27117828   PMCID:PMC4847335 | pubmed | 27117828 | create date:2016/04/28   first author:Hoonhorst SJ |
| Multi-walled carbon nanotube induces nitrative DNA damage in human lung epithelial cells via HMGB1-RAGE interaction and Toll-like receptor 9 activation. | /pubmed/27026438 | Hiraku Y, Guo F, Ma N, Yamada T, Wang S, Kawanishi S, Murata M.                                                                                                                        | Part Fibre Toxicol. 2016 Mar 29;13:16. doi: 10.1186/s12989-016-0127-7.                                | Part Fibre Toxicol. 2016              | PubMed | citatio n | PMID:27026438   PMCID:PMC4812657 | pubmed | 27026438 | create date:2016/03/31   first author:Hiraku Y     |
| Traditional and emerging indicators of cardiovascular risk in chronic obstructive pulmonary disease.                                                     | /pubmed/26965223 | John M, McKeever TM, Haddad MA, Hall IP, Sayers I, Cockcroft JR, Bolton CE.                                                                                                            | Chron Respir Dis. 2016 Aug;13(3):247-55. doi: 10.1177/1479972316636995. Epub 2016 Mar 10.             | Chron Respir Dis. 2016                | PubMed | citatio n | PMID:26965223   PMCID:PMC5720186 | pubmed | 26965223 | create date:2016/03/12   first author:John M       |
| Association between HMGB1 and COPD: A Systematic Review.                                                                                                 | /pubmed/26798204 | Gangemi S, Casciaro M, Trapani G, Quartuccio S, Navarra M, Pioggia G, Imbalzano E.                                                                                                     | Mediators Inflamm. 2015;2015:164913. doi: 10.1155/2015/164913. Epub 2015 Dec 21. Review.              | Mediators Inflamm. 2015               | PubMed | citatio n | PMID:26798204   PMCID:PMC4698778 | pubmed | 26798204 | create date:2016/01/23   first author:Gangemi S    |
| Relationship between gene expression and lung function in Idiopathic Interstitial Pneumonias.                                                            | /pubmed/26503507 | Steele MP, Luna LG, Coldren CD, Murphy E, Hennessy CE, Heinz D, Evans CM, Groshong S, Cool C, Cosgrove GP, Brown KK, Fingerlin TE, Schwarz MI, Schwartz DA, Yang IV.                   | BMC Genomics. 2015 Oct 26;16:869. doi: 10.1186/s12864-015-2102-3.                                     | BMC Genomics. 2015                    | PubMed | citatio n | PMID:26503507   PMCID:PMC4621862 | pubmed | 26503507 | create date:2015/10/28   first author:Steele MP    |

|                                                                                                                                    |                  |                                                                                                                                                         |                                                                                                         |                                     |        |          |                                  |        |          |                                                          |
|------------------------------------------------------------------------------------------------------------------------------------|------------------|---------------------------------------------------------------------------------------------------------------------------------------------------------|---------------------------------------------------------------------------------------------------------|-------------------------------------|--------|----------|----------------------------------|--------|----------|----------------------------------------------------------|
| Increased S100A4 expression in the vasculature of human COPD lungs and murine model of smoke-induced emphysema.                    | /pubmed/26483185 | Reimann S, Fink L, Wilhelm J, Hoffmann J, Bednorz M, Seimetz M, Dessureault I, Troesser R, Ghanim B, Klepetko W, Seeger W, Weissmann N, Kwapiszewska G. | Respir Res. 2015 Oct 20;16:127. doi: 10.1186/s12931-015-0284-5.                                         | Respir Res. 2015                    | PubMed | citation | PMID:26483185   PMCID:PMC4612429 | pubmed | 26483185 | create date:2015/10/21   first author:Reimann S          |
| Expression and DNA methylation status of the Rap2B gene in human bronchial epithelial cells treated by cigarette smoke condensate. | /pubmed/26308105 | Zhang S, Zhou M, Jiang G, Gong C, Cui D, Luo L, Wu D, Huang H, Zhang Q, Yang L.                                                                         | Inhal Toxicol. 2015;27(10):502-9. doi: 10.3109/08958378.2015.1076546. Epub 2015 Aug 26.                 | Inhal Toxicol. 2015                 | PubMed | citation | PMID:26308105                    | pubmed | 26308105 | create date:2015/08/27   first author:Zhang S            |
| Lung inflammation biomarkers and lung function in children chronically exposed to arsenic.                                         | /pubmed/26048584 | Olivas-Calder n E, Recio-Vega R, Gandolfi AJ, Lantz RC, Gonz lez-Cortez T, Gonzalez-De Alba C, Froines JR, Espinosa-Fematt JA.                          | Toxicol Appl Pharmacol. 2015 Sep 1;287(2):161-7. doi: 10.1016/j.taap.2015.06.001. Epub 2015 Jun 3.      | Toxicol Appl Pharmacol. 2015        | PubMed | citation | PMID:26048584   PMCID:PMC4751871 | pubmed | 26048584 | create date:2015/06/07   first author:Olivas-Calder n E  |
| RAGE-ligands axis: A new 'driving force' for cigarette smoke-induced airway inflammation in COPD?                                  | /pubmed/25998568 | Li M, Guo L, Wang H, Wang T, Shen Y, Liao Z, Wen F, Chen L.                                                                                             | Respirology. 2015 Aug;20(6):998-9. doi: 10.1111/resp.12557. Epub 2015 May 22.                           | Respirology. 2015                   | PubMed | citation | PMID:25998568                    | pubmed | 25998568 | create date:2015/05/23   first author:Li M               |
| Mortality analyses in the updated French cohort of uranium miners (1946-2007).                                                     | /pubmed/25410273 | Rage E, Ca r-Lorho S, Drubay D, Ancelet S, Laroche P, Laurier D.                                                                                        | Int Arch Occup Environ Health. 2015 Aug;88(6):717-30. doi: 10.1007/s00420-014-0998-6. Epub 2014 Nov 20. | Int Arch Occup Environ Health. 2015 | PubMed | citation | PMID:25410273                    | pubmed | 25410273 | create date:2014/11/21   first author:Rage E             |
| The association of plasma biomarkers with computed tomography-assessed emphysema phenotypes.                                       | /pubmed/25306249 | Carolan BJ, Hughes G, Morrow J, Hersh CP, O'Neal WK, Rennard S, Pillai SG, Belloni P, Cockayne DA, Comellas AP, Han M, Zemans RL, Kechris K, Bowler RP. | Respir Res. 2014 Oct 12;15:127. doi: 10.1186/s12931-014-0127-9.                                         | Respir Res. 2014                    | PubMed | citation | PMID:25306249   PMCID:PMC4198701 | pubmed | 25306249 | create date:2014/10/13   first author:Carolan BJ         |
| Chest X-ray screening examinations among French uranium miners: exposure estimation and impact on radon-                           | /pubmed/25017574 | Laborde-Cast rot H, Laurier D, Ca r-Lorho S, Etard C, Acker A, Rage E.                                                                                  | Occup Environ Med. 2014 Sep;71(9):611-8. doi: 10.1136/oemed-2013-101937. Epub 2014 Jun 23.              | Occup Environ Med. 2014             | PubMed | citation | PMID:25017574                    | pubmed | 25017574 | create date:2014/07/16   first author:Laborde-Cast rot H |

|                                                                                                                                                                      |                  |                                                                                                                                                |                                                                                                  |                                 |        |          |                                  |        |          |                                                  |
|----------------------------------------------------------------------------------------------------------------------------------------------------------------------|------------------|------------------------------------------------------------------------------------------------------------------------------------------------|--------------------------------------------------------------------------------------------------|---------------------------------|--------|----------|----------------------------------|--------|----------|--------------------------------------------------|
| associated lung cancer risk.                                                                                                                                         |                  |                                                                                                                                                |                                                                                                  |                                 |        |          |                                  |        |          |                                                  |
| Receptor for advanced glycation end-products regulates lung fluid balance via protein kinase C-gp91(phox) signaling to epithelial sodium channels.                   | /pubmed/24978055 | Downs CA, Kreiner LH, Johnson NM, Brown LA, Helms MN.                                                                                          | Am J Respir Cell Mol Biol. 2015 Jan;52(1):75-87. doi: 10.1165/rcmb.2014-0002OC.                  | Am J Respir Cell Mol Biol. 2015 | PubMed | citation | PMID:24978055   PMCID:PMC5455303 | pubmed | 24978055 | create date:2014/07/01   first author:Downs CA   |
| Comparative analyses of volatile organic compounds (VOCs) from patients, tumors and transformed cell lines for the validation of lung cancer-derived breath markers. | /pubmed/24862102 | Filipiak W, Filipiak A, Sponring A, Schmid T, Zelger B, Ager C, Klodzinska E, Denz H, Pizzini A, Lucciarini P, Jamnig H, Troppmair J, Amann A. | J Breath Res. 2014 Jun;8(2):027111. doi: 10.1088/1752-7155/8/2/027111. Epub 2014 May 27.         | J Breath Res. 2014              | PubMed | citation | PMID:24862102                    | pubmed | 24862102 | create date:2014/05/28   first author:Filipiak W |
| Kidney cancer mortality and ionizing radiation among French and German uranium miners.                                                                               | /pubmed/24858911 | Drubay D, Ancelet S, Acker A, Kreuzer M, Laurier D, Rage E.                                                                                    | Radiat Environ Biophys. 2014 Aug;53(3):505-13. doi: 10.1007/s00411-014-0547-4. Epub 2014 May 24. | Radiat Environ Biophys. 2014    | PubMed | citation | PMID:24858911                    | pubmed | 24858911 | create date:2014/05/27   first author:Drubay D   |
| Soluble receptor for advanced glycation end-products and progression of airway disease.                                                                              | /pubmed/24758342 | Iwamoto H, Gao J, Pulkkinen V, Toljamo T, Nieminen P, Mazur W.                                                                                 | BMC Pulm Med. 2014 Apr 24;14:68. doi: 10.1186/1471-2466-14-68.                                   | BMC Pulm Med. 2014              | PubMed | citation | PMID:24758342   PMCID:PMC4021457 | pubmed | 24758342 | create date:2014/04/25   first author:Iwamoto H  |
| Overexpression of RAGE contributes to cigarette smoke-induced nitric oxide generation in COPD.                                                                       | /pubmed/24535058 | Chen L, Wang T, Guo L, Shen Y, Yang T, Wan C, Liao Z, Xu D, Wen F.                                                                             | Lung. 2014 Apr;192(2):267-75. doi: 10.1007/s00408-014-9561-1. Epub 2014 Feb 18.                  | Lung. 2014                      | PubMed | citation | PMID:24535058                    | pubmed | 24535058 | create date:2014/02/19   first author:Chen L     |
| Association of polymorphisms of the receptor for advanced glycation end products gene with COPD in the Chinese population.                                           | /pubmed/24520905 | Li Y, Yang C, Ma G, Gu X, Chen M, Chen Y, Zhao B, Cui L, Li K.                                                                                 | DNA Cell Biol. 2014 Apr;33(4):251-8. doi: 10.1089/dna.2013.2303. Epub 2014 Feb 12.               | DNA Cell Biol. 2014             | PubMed | citation | PMID:24520905   PMCID:PMC3967375 | pubmed | 24520905 | create date:2014/02/14   first author:Li Y       |

|                                                                                                                                                                  |                  |                                                                                                                                                                                                                                                                                                                                                 |                                                                                                              |                              |        |              |               |            |              |                                                               |
|------------------------------------------------------------------------------------------------------------------------------------------------------------------|------------------|-------------------------------------------------------------------------------------------------------------------------------------------------------------------------------------------------------------------------------------------------------------------------------------------------------------------------------------------------|--------------------------------------------------------------------------------------------------------------|------------------------------|--------|--------------|---------------|------------|--------------|---------------------------------------------------------------|
| The presence and progression of emphysema in COPD as determined by CT scanning and biomarker expression: a prospective analysis from the ECLIPSE study.          | /pubmed/24429093 | Coxson HO, Dirksen A, Edwards LD, Yates JC, Agusti A, Bakke P, Calverley PM, Celli B, Crim C, Duvoix A, Fauerbach PN, Lomas DA, Macnee W, Mayer RJ, Miller BE, MÅ¼ller NL, Rennard SI, Silverman EK, Tal-Singer R, Wouters EF, Vestbo J; Evaluation of COPD Longitudinally to Identify Predictive Surrogate Endpoints (ECLIPSE) Investigators.. | Lancet Respir Med. 2013 Apr;1(2):129-36. doi: 10.1016/S2213-2600(13)70006-7. Epub 2013 Feb 1.                | Lancet Respir Med. 2013      | PubMed | citatio<br>n | PMID:24429093 | pubm<br>ed | 244290<br>93 | create<br>date:2014/01/<br>17   first<br>author:Coxson<br>HO  |
| A specific DAMP profile identifies susceptibility to smoke-induced airway inflammation.                                                                          | /pubmed/24311772 | Pouwels SD, Heijink IH, van Oosterhout AJ, Nawijn MC.                                                                                                                                                                                                                                                                                           | Eur Respir J. 2014 Apr;43(4):1183-6. doi: 10.1183/09031936.00127813. Epub 2013 Dec 5. No abstract available. | Eur Respir J. 2014           | PubMed | citatio<br>n | PMID:24311772 | pubm<br>ed | 243117<br>72 | create<br>date:2013/12/<br>07   first<br>author:Powel<br>s SD |
| Transient early wheeze and lung function in early childhood associated with chronic obstructive pulmonary disease genes.                                         | /pubmed/23886569 | Kerkhof M, Boezen HM, Granell R, Wijga AH, Brunekreef B, Smit HA, de Jongste JC, Thijs C, Mommers M, Penders J, Henderson J, Koppelman GH, Postma DS.                                                                                                                                                                                           | J Allergy Clin Immunol. 2014 Jan;133(1):68-76.e1-4. doi: 10.1016/j.jaci.2013.06.004. Epub 2013 Jul 22.       | J Allergy Clin Immunol. 2014 | PubMed | citatio<br>n | PMID:23886569 | pubm<br>ed | 238865<br>69 | create<br>date:2013/07/<br>28   first<br>author:Kerkhof<br>M  |
| Differences in plasma and sputum biomarkers between COPD and COPD-asthma overlap.                                                                                | /pubmed/23794464 | Iwamoto H, Gao J, Koskela J, Kinnula V, Kobayashi H, Laitinen T, Mazur W.                                                                                                                                                                                                                                                                       | Eur Respir J. 2014 Feb;43(2):421-9. doi: 10.1183/09031936.00024313. Epub 2013 Jun 21.                        | Eur Respir J. 2014           | PubMed | citatio<br>n | PMID:23794464 | pubm<br>ed | 237944<br>64 | create<br>date:2013/06/<br>25   first<br>author:Iwamot<br>o H |
| Receptor for advanced glycation end products: a new therapeutic target for chronic obstructive pulmonary disease?                                                | /pubmed/23287523 | Chen L, Liu L, Wang T, Shen YC, Wen FQ.                                                                                                                                                                                                                                                                                                         | Arch Med Res. 2013 Jan;44(1):75-6. doi: 10.1016/j.arcmed.2012.12.003. Epub 2013 Jan 1.                       | Arch Med Res. 2013           | PubMed | citatio<br>n | PMID:23287523 | pubm<br>ed | 232875<br>23 | create<br>date:2013/01/<br>05   first<br>author:Chen L        |
| The performance of functional methods for correcting non-Gaussian measurement error within Poisson regression: corrected excess risk of lung cancer mortality in | /pubmed/22996087 | Allodji RS, ThiÅ©baut AC, Leuraud K, Rage E, Henry S, Laurier D, BÅ©nichou J.                                                                                                                                                                                                                                                                   | Stat Med. 2012 Dec 30;31(30):4428-43. doi: 10.1002/sim.5618. Epub 2012 Sep 21.                               | Stat Med. 2012               | PubMed | citatio<br>n | PMID:22996087 | pubm<br>ed | 229960<br>87 | create<br>date:2012/09/<br>22   first<br>author:Allodji<br>RS |

|                                                                                                                                                                                               |                  |                                                                                                                                                                      |                                                                                                   |                                 |        |          |                                  |        |          |                                                   |
|-----------------------------------------------------------------------------------------------------------------------------------------------------------------------------------------------|------------------|----------------------------------------------------------------------------------------------------------------------------------------------------------------------|---------------------------------------------------------------------------------------------------|---------------------------------|--------|----------|----------------------------------|--------|----------|---------------------------------------------------|
| relation to radon exposure among French uranium miners.                                                                                                                                       |                  |                                                                                                                                                                      |                                                                                                   |                                 |        |          |                                  |        |          |                                                   |
| Systemic biomarkers of neutrophilic inflammation, tissue injury and repair in COPD patients with differing levels of disease severity.                                                        | /pubmed/22701684 | Cockayne DA, Cheng DT, Waschki B, Sridhar S, Ravindran P, Hilton H, Kourteva G, Bitter H, Pillai SG, Visvanathan S, Müller KC, Holz O, Magnussen H, Watz H, Fine JS. | PLoS One. 2012;7(6):e38629. doi: 10.1371/journal.pone.0038629. Epub 2012 Jun 12.                  | PLoS One. 2012                  | PubMed | citation | PMID:22701684   PMCID:PMC3373533 | pubmed | 22701684 | create date:2012/06/16   first author:Cockayne DA |
| RAGE: a new frontier in chronic airways disease.                                                                                                                                              | /pubmed/22506507 | Sukkar MB, Ullah MA, Gan WJ, Wark PA, Chung KF, Hughes JM, Armour CL, Phipps S.                                                                                      | Br J Pharmacol. 2012 Nov;167(6):1161-76. doi: 10.1111/j.1476-5381.2012.01984.x. Review.           | Br J Pharmacol. 2012            | PubMed | citation | PMID:22506507   PMCID:PMC3504985 | pubmed | 22506507 | create date:2012/04/18   first author:Sukkar MB   |
| CHRNA3/5, IREB2, and ADCY2 are associated with severe chronic obstructive pulmonary disease in Poland.                                                                                        | /pubmed/22461431 | Hardin M, Zielinski J, Wan ES, Hersh CP, Castaldi PJ, Schwinder E, Hawrylkiewicz I, Sliwinski P, Cho MH, Silverman EK.                                               | Am J Respir Cell Mol Biol. 2012 Aug;47(2):203-8. doi: 10.1165/rcmb.2012-0011OC. Epub 2012 Mar 29. | Am J Respir Cell Mol Biol. 2012 | PubMed | citation | PMID:22461431   PMCID:PMC3423462 | pubmed | 22461431 | create date:2012/03/31   first author:Hardin M    |
| Risk of lung cancer mortality in relation to lung doses among French uranium miners: follow-up 1956-1999.                                                                                     | /pubmed/22206233 | Rage E, Vacquier B, Blanchardon E, Allodji RS, Marsh JW, Cañr-Lorho S, Acker A, Laurier D.                                                                           | Radiat Res. 2012 Mar;177(3):288-97. Epub 2011 Dec 29.                                             | Radiat Res. 2012                | PubMed | citation | PMID:22206233                    | pubmed | 22206233 | create date:2011/12/31   first author:Rage E      |
| The influence of multiple types of occupational exposure to radon, gamma rays and long-lived radionuclides on mortality risk in the French "post-55" sub-cohort of uranium miners: 1956-1999. | /pubmed/21936607 | Vacquier B, Rage E, Leuraud K, Cañr-Lorho S, Houot J, Acker A, Laurier D.                                                                                            | Radiat Res. 2011 Dec;176(6):796-806. Epub 2011 Sep 21.                                            | Radiat Res. 2011                | PubMed | citation | PMID:21936607                    | pubmed | 21936607 | create date:2011/09/23   first author:Vacquier B  |
| Soluble receptor for advanced glycation end products in COPD: relationship with                                                                                                               | /pubmed/21450080 | Miniati M, Monti S, Basta G, Cocci F, Fornai E, Bottai M.                                                                                                            | Respir Res. 2011 Mar 30;12:37. doi: 10.1186/1465-9921-12-37.                                      | Respir Res. 2011                | PubMed | citation | PMID:21450080   PMCID:PMC3072955 | pubmed | 21450080 | create date:2011/04/01   first                    |

|                                                                                                                                                                                            |                  |                                                                                                                                        |                                                                                                        |                                 |        |          |                                  |        |          |                                                   |
|--------------------------------------------------------------------------------------------------------------------------------------------------------------------------------------------|------------------|----------------------------------------------------------------------------------------------------------------------------------------|--------------------------------------------------------------------------------------------------------|---------------------------------|--------|----------|----------------------------------|--------|----------|---------------------------------------------------|
| emphysema and chronic cor pulmonale: a case-control study.                                                                                                                                 |                  |                                                                                                                                        |                                                                                                        |                                 |        |          |                                  |        |          | author:Miniati M                                  |
| Road RAGE? The role of diesel particulate matter in lung inflammation.                                                                                                                     | /pubmed/21356633 | Betts KS.                                                                                                                              | Environ Health Perspect. 2011 Mar;119(3):a132. doi: 10.1289/ehp.119-a132a. No abstract available.      | Environ Health Perspect. 2011   | PubMed | citation | PMID:21356633   PMCID:PMC3060018 | pubmed | 21356633 | create date:2011/03/02   first author:Betts KS    |
| Analysis of volatile organic compounds (VOCs) in the headspace of NCI-H1666 lung cancer cells.                                                                                             | /pubmed/21263191 | Sponring A, Filipiak W, Ager C, Schubert J, Miekisch W, Amann A, Troppmair J.                                                          | Cancer Biomark. 2010;7(3):153-61. doi: 10.3233/CBM-2010-0182.                                          | Cancer Biomark. 2010            | PubMed | citation | PMID:21263191                    | pubmed | 21263191 | create date:2011/01/26   first author:Sponring A  |
| Proteomic studies on receptor for advanced glycation end product variants in idiopathic pulmonary fibrosis and chronic obstructive pulmonary disease.                                      | /pubmed/21137019 | Ohlmeier S, Mazur W, Salmenkivi K, Myll rniemi M, Bergmann U, Kinnula VL.                                                              | Proteomics Clin Appl. 2010 Jan;4(1):97-105. doi: 10.1002/prca.200900128. Epub 2010 Jan 7.              | Proteomics Clin Appl. 2010      | PubMed | citation | PMID:21137019                    | pubmed | 21137019 | create date:2010/12/08   first author:Ohlmeier S  |
| Advanced glycation end products and its receptor (RAGE) are increased in patients with COPD.                                                                                               | /pubmed/21112201 | Wu L, Ma L, Nicholson LF, Black PN.                                                                                                    | Respir Med. 2011 Mar;105(3):329-36. doi: 10.1016/j.rmed.2010.11.001. Epub 2010 Nov 26.                 | Respir Med. 2011                | PubMed | citation | PMID:21112201                    | pubmed | 21112201 | create date:2010/11/30   first author:Wu L        |
| Diesel particulate matter induces receptor for advanced glycation end-products (RAGE) expression in pulmonary epithelial cells, and RAGE signaling influences NF- B-mediated inflammation. | /pubmed/21087909 | Reynolds PR, Wasley KM, Allison CH.                                                                                                    | Environ Health Perspect. 2011 Mar;119(3):332-6. doi: 10.1289/ehp.1002520. Epub 2010 Nov 18.            | Environ Health Perspect. 2011   | PubMed | citation | PMID:21087909   PMCID:PMC3059995 | pubmed | 21087909 | create date:2010/11/20   first author:Reynolds PR |
| Expression of high-mobility group box 1 and of receptor for advanced glycation end products in chronic                                                                                     | /pubmed/20133931 | Ferhani N, Letuve S, Kozhich A, Thibaudeau O, Grandsaigne M, Maret M, Dombret MC, Sims GP, Kolbeck R, Coyle AJ, Aubier M, Pretolani M. | Am J Respir Crit Care Med. 2010 May 1;181(9):917-27. doi: 10.1164/rccm.200903-0340OC. Epub 2010 Feb 4. | Am J Respir Crit Care Med. 2010 | PubMed | citation | PMID:20133931                    | pubmed | 20133931 | create date:2010/02/06   first author:Ferhani N   |

|                                                                                                                                                                        |                  |                                                                                                                                                                                                                 |                                                                                          |                                  |        |          |                                  |        |          |                                                    |
|------------------------------------------------------------------------------------------------------------------------------------------------------------------------|------------------|-----------------------------------------------------------------------------------------------------------------------------------------------------------------------------------------------------------------|------------------------------------------------------------------------------------------|----------------------------------|--------|----------|----------------------------------|--------|----------|----------------------------------------------------|
| obstructive pulmonary disease.                                                                                                                                         |                  |                                                                                                                                                                                                                 |                                                                                          |                                  |        |          |                                  |        |          |                                                    |
| Noninvasive detection of lung cancer by analysis of exhaled breath.                                                                                                    | /pubmed/19788722 | Bajtarevic A, Ager C, Pienz M, Klieber M, Schwarz K, Ligor M, Ligor T, Filipiak W, Denz H, Fiegl M, Hilbe W, Weiss W, Lukas P, Jamnig H, Hackl M, Haidenberger A, Buszewski B, Miekisch W, Schubert J, Amann A. | BMC Cancer. 2009 Sep 29;9:348. doi: 10.1186/1471-2407-9-348.                             | BMC Cancer. 2009                 | PubMed | citation | PMID:19788722   PMCID:PMC2761408 | pubmed | 19788722 | create date:2009/10/01   first author:Bajtarevic A |
| Changes in weather and the effects on pediatric asthma exacerbations.                                                                                                  | /pubmed/19788019 | Mireku N, Wang Y, Ager J, Reddy RC, Baptist AP.                                                                                                                                                                 | Ann Allergy Asthma Immunol. 2009 Sep;103(3):220-4. doi: 10.1016/S1081-1206(10)60185-8.   | Ann Allergy Asthma Immunol. 2009 | PubMed | citation | PMID:19788019                    | pubmed | 19788019 | create date:2009/10/01   first author:Mireku N     |
| Association between modelled traffic-related air pollution and asthma score in the ECRHS.                                                                              | /pubmed/19443533 | Jacquemin B, Sunyer J, Forsberg B, Aguilera I, Bouso L, Briggs D, de Marco R, Garc a-Esteban R, Heinrich J, Jarvis D, Maldonado JA, Payo F, Rage E, Vienneau D, K nzli N.                                       | Eur Respir J. 2009 Oct;34(4):834-42. doi: 10.1183/09031936.00138208. Epub 2009 May 14.   | Eur Respir J. 2009               | PubMed | citation | PMID:19443533                    | pubmed | 19443533 | create date:2009/05/16   first author:Jacquemin B  |
| Determination of volatile organic compounds in exhaled breath of patients with lung cancer using solid phase microextraction and gas chromatography mass spectrometry. | /pubmed/19397483 | Ligor M, Ligor T, Bajtarevic A, Ager C, Pienz M, Klieber M, Denz H, Fiegl M, Hilbe W, Weiss W, Lukas P, Jamnig H, Hackl M, Buszewski B, Miekisch W, Schubert J, Amann A.                                        | Clin Chem Lab Med. 2009;47(5):550-60. doi: 10.1515/CCLM.2009.133.                        | Clin Chem Lab Med. 2009          | PubMed | citation | PMID:19397483                    | pubmed | 19397483 | create date:2009/04/29   first author:Ligor M      |
| Total serum IgE levels are associated with ambient ozone concentration in asthmatic adults.                                                                            | /pubmed/19076539 | Rage E, Jacquemin B, Nadif R, Oryszczyn MP, Siroux V, Aguilera I, Kauffmann F, K nzli N; Epidemiological Study on the Genetics Environment of Asthma (EGEA)..                                                   | Allergy. 2009 Jan;64(1):40-6. doi: 10.1111/j.1398-9995.2008.01800.x. Epub 2008 Nov 28.   | Allergy. 2009                    | PubMed | citation | PMID:19076539                    | pubmed | 19076539 | create date:2008/12/17   first author:Rage E       |
| Air pollution and asthma severity in adults.                                                                                                                           | /pubmed/19017701 | Rage E, Siroux V, K nzli N, Pin I, Kauffmann F; Epidemiological Study on the Genetics and Environment of Asthma..                                                                                               | Occup Environ Med. 2009 Mar;66(3):182-8. doi: 10.1136/oem.2007.038349. Epub 2008 Nov 18. | Occup Environ Med. 2009          | PubMed | citation | PMID:19017701   PMCID:PMC2663354 | pubmed | 19017701 | create date:2008/11/20   first author:Rage E       |
| Immortalization of human alveolar epithelial cells to                                                                                                                  | /pubmed/18539954 | Kemp SJ, Thorley AJ, Gorelik J, Seckl MJ, O'Hare MJ, Arcaro A, Korchev Y, Goldstraw P, Tetley TD.                                                                                                               | Am J Respir Cell Mol Biol. 2008 Nov;39(5):591-7. doi:                                    | Am J Respir Cell                 | PubMed | citation | PMID:18539954                    | pubmed | 18539954 | create date:2008/06/                               |



| investigate nanoparticle uptake.                                                                                                    |                  |                                                                    | 10.1165/rcmb.2007-0334OC. Epub 2008 Jun 6.             | Mol Biol. 2008         |          |          | PMCID:PMC2643209 |        |           | 10   first author:Kemp SJ                                |
|-------------------------------------------------------------------------------------------------------------------------------------|------------------|--------------------------------------------------------------------|--------------------------------------------------------|------------------------|----------|----------|------------------|--------|-----------|----------------------------------------------------------|
| Title                                                                                                                               | URL              | Description                                                        | Details                                                | ShortDetails           | Resource | Type     | Identifiers      | Db     | EntrezUID | Properties                                               |
| The receptor for advanced glycation end products and its ligands: a new inflammatory pathway in lung disease?                       | /pubmed/16941014 | Morbini P, Villa C, Campo I, Zorzetto M, Inghilleri S, Luisetti M. | Mod Pathol. 2006 Nov;19(11):1437-45. Epub 2006 Aug 25. | Mod Pathol. 2006       | PubMed   | citation | PMID:16941014    | pubmed | 16941014  | create date:2006/08/31   first author:Morbini P          |
| Expressive/suppressive anger-coping responses, gender, and types of mortality: a 17-year follow-up (Tecumseh, Michigan, 1971-1988). | /pubmed/12883109 | Harburg E, Julius M, Kaciroti N, Gleiberman L, Schork MA.          | Psychosom Med. 2003 Jul-Aug;65(4):588-97.              | Psychosom Med. 2003    | PubMed   | citation | PMID:12883109    | pubmed | 12883109  | create date:2003/07/29   first author:Harburg E          |
| Gene expression patterns of paired bronchioloalveolar carcinoma and benign lung tissue.                                             | /pubmed/11688848 | Goodwin LO, Mason JM, Hajdu SI.                                    | Ann Clin Lab Sci. 2001 Oct;31(4):369-75.               | Ann Clin Lab Sci. 2001 | PubMed   | citation | PMID:11688848    | pubmed | 11688848  | create date:2001/11/02   first author:Goodwin LO         |
| Autoimmunity to collagen in human lung cancer.                                                                                      | /pubmed/8548751  | Fernandez-Madrid F, Karvonen RL, Kraut MJ, Czelusniak B, Ager JW.  | Cancer Res. 1996 Jan 1;56(1):121-6.                    | Cancer Res. 1996       | PubMed   | citation | PMID:8548751     | pubmed | 8548751   | create date:1996/01/01   first author:Fernandez-Madrid F |
